# Monitoring of Neuromuscular Function

Hassan H. Ali, M.D.,\* and John J. Savarese, M.D.\*

## I. Introduction

It is universally acknowledged<sup>1-7</sup> that monitoring of neuromuscular transmission provides valuable information to the anesthetist. The acquisition of such data often contributes to, or is mandatory for, improved patient care. In this review the many factors affecting normal neuromuscular transmission are analyzed. The practical value of clinical and laboratory data in anticipating the response of the individual patient to neuromuscular blocking drugs is emphasized. The clinical relevance of twitch height, tetanic fade, train-of-four value, etc., is discussed. We hope that presentation of the data in numerical fashion wherever possible will foster a better appreciation of the graded process of neuromuscular blockade, so that improved anesthetic management may result.

## II. Clinical Types of Neuromuscular Blockade

Three types of neuromuscular blockade can be differentiated clinically according to the pattern of the evoked muscle response to changes in stimulus frequency.<sup>4</sup> They are: nondepolarizing neuromuscular block<sup>4,8,9</sup>; depolarizing block<sup>10</sup>; dual block, desensitizing, or Phase II block.<sup>3,10-12</sup> This classification has been questioned by some.<sup>13,14</sup>

### A. Nondepolarizing Block

This type of block is induced by: *d*-tubocurarine (curare), metocurine (Metubine), gallamine triethiodide (Flaxedil), pancuronium (Pavulon), and alcuronium (Alloferine).

\* Assistant Professor of Anaesthesia, Harvard Medical School; Assistant Anesthetist, Massachusetts General Hospital.

Received from the Anesthesia Laboratories of the Harvard Medical School at the Massachusetts General Hospital, Boston, Massachusetts 02114.

Address reprint requests to either author: Department of Anesthesia, Massachusetts General Hospital, Boston, Massachusetts 02114.

It is characterized by:

1. Absence of fasciculation (no muscle fiber activity prior to the onset of paralysis).
2. Nonsustained response to twitch (slow) or tetanic (fast) rates of stimulation (*i.e.*, there is fade).
3. Posttetanic potentiation.
4. Antagonism of the block by anticholinesterase drugs.

## MONITORING OF NEUROMUSCULAR FUNCTION

- I. Introduction
- II. Clinical types of neuromuscular blockade
  - A. Nondepolarizing block
  - B. Depolarizing block
  - C. Dual block (Phase II or desensitizing block)
- III. Clinical monitoring of neuromuscular function
- IV. Methods of measurement of neuromuscular function (evoked responses)
  - A. Tension measurement
  - B. Electromyographic measurements
- V. Clinical utility of various evoked responses
- VI. Integrated electromyography (IEMG)
- VII. Correlation of evoked responses with clinical observations
- VIII. Anatomy of the neuromuscular junction and physiology of acetylcholine synthesis and release
- IX. Pharmacology of neuromuscular blockade
- X. Physiologic and pharmacologic factors that may alter neuromuscular function or the normal responses to neuromuscular blocking drugs
  - A. General anesthetic agents
  - B. Electrolyte imbalance
  - C. pH changes
  - D. Hypothermia
  - E. Hepatic and renal disease
  - F. Enzymatic abnormalities
    - A. Plasma cholinesterase
    - B. Creatine phosphokinase (CPK), aldolase, lactic dehydrogenase (LDH)
  - G. Neuromuscular diseases
  - H. Drug interactions

5. Potentiation of the block by *d*-tubocurarine and other nondepolarizers.
6. Antagonism of the block by depolarizing drugs.

### B. Depolarizing Block

This type of neuromuscular block follows the administration of succinylcholine, decamethonium, and similar substances.

It is characterized by:

1. Muscle fasciculation (asynchronous contraction of multiple motor units, manifested usually by fine fibrillary movements and occasionally by full skeletal muscle movements) preceding the onset of block.
2. Initial absence of fade at slow and fast rates of stimulation.
3. Absence of posttetanic potentiation.
4. Potentiation of the block by anticholinesterases.
5. Antagonism of the block by *d*-tubocurarine.
6. Potentiation of the block by other depolarizing substances.

### C. Dual Block (Phase II or Desensitization Block)

Repeated administration of a depolarizing neuromuscular blocking drug over a prolonged period ultimately leads to development of dual block, the onset of which has been said to be a gradual process.<sup>10</sup> Churchill-Davidson *et al.*<sup>10</sup> found that a dose of at least 0.5 g of succinylcholine was needed in patients anesthetized with thiopental-nitrous oxide to establish a full dual block, which could be reversed by neostigmine. Katz *et al.*,<sup>16</sup> using a variety of anesthetics, found that the earliest signs of phase II block were reached after a succinylcholine dose of only 2.2–3.0 mg/kg (154–210 mg for a 70-kg adult). Crul and associates<sup>11</sup> confirmed that the onset of dual block after succinylcholine is both dose- and time-dependent. Classic dual block has been described to occur following the clinical intubating dose (1 mg/kg) of succinylcholine in patients who have atypical plasma cholinesterase.<sup>15</sup> De Jong and Freund<sup>14</sup> went further and claimed that depolarization or

phase I block never occurred in man. Their patients, however, were studied during deep halothane anesthesia.

Five stages in the development of dual block have been described<sup>10</sup>:

1. A typical depolarization block occurs first.
2. Stage of tachyphylaxis: a diminished response occurs following repeated doses.
3. Stage of Wedensky inhibition: fade of successive EMG potentials develops in response to high-frequency (tetanic) stimulation. Slow (twitch) rates are sustained.
4. Stage of "fade and potentiation": anticholinesterases improve neuromuscular transmission in this stage.
5. Nondepolarization stage: all the classic signs of a nondepolarizing block are present.

Contrary to previous reports<sup>3,10</sup> that maintain that the change from depolarizing to dual block is a gradual process, Lee<sup>12</sup> has found that if the response to succinylcholine is monitored by the train-of-four stimulus, the ratio of the fourth to the first evoked muscle response shows a relatively sudden shift from phase I to phase II characteristics. Phase I is characterized by a high train-of-four ratio or minimal fade (ratio 0.7–0.9). Phase II is characterized by a low train-of-four ratio (0.3 or less). The phase II block was antagonized by anticholinesterases. Transition from phase I to phase II occurred after administration of 2–4 mg/kg succinylcholine during halothane anesthesia. After 3–5 mg/kg, phase II block is well established.<sup>12</sup> In our experience, 7–8 mg/kg succinylcholine are needed to establish phase II block during nitrous oxide-narcotic anesthesia (unpublished data).

The simultaneous onset of tachyphylaxis and phase II block suggests that the two are causally related.<sup>12</sup> Since succinylcholine antagonizes the effect of tubocurarine, it is possible that in phase II succinylcholine antagonizes its own tubocurarine-like effect. According to Lee,<sup>12</sup> if tetanic stimulation is avoided, dual block can be assessed as often as every 12 seconds. Therefore, it is possible to detect phase II block at its very onset.

### III. Clinical Monitoring of Neuromuscular Function

Early attempts to study the effects of neuromuscular blocking drugs in man were based on clinical observations of signs of muscle weakness such as inability to open the mouth or eyes, protrude the tongue, swallow, or maintain grip strength.<sup>17-20</sup> Some advocated the use of devices that assess maximal voluntary efforts of the abdominal recti.<sup>21</sup> Additional methods included measurement of respiratory variables such as minute volume and vital capacity<sup>18,20</sup> or maximum inspiration.<sup>19</sup> Others recorded diaphragmatic activity on a fluorescent screen.<sup>22</sup> Bendixen *et al.*<sup>23</sup> have measured inspiratory force (the negative pressure developed against an occluded airway) to demonstrate the presence of residual weakness due to neuromuscular blockade. Some clinical investigators<sup>24,25</sup> have relied upon testing for head-lift, based on the observation that the muscles of the neck are among the first to be influenced by the paralyzing action of muscle relaxants before any significant effect on respiratory muscles can be detected.

Measurement of voluntary muscular contraction cannot be carried out during anesthesia. Even in conscious volunteers, the accuracy of the above-mentioned clinical tests is limited by the ability of an individual to reproduce a given effort. Volitional measurements have, however, proven useful as a guide to laboratory investigation, particularly when repeated measurements are made in the same individual. Tidal volume and inspiratory force measurements in anesthetized patients cannot be considered satisfactory methods for monitoring neuromuscular function because drugs such as narcotics, hypnotics, and inhalation anesthetics all depress respiratory function. It is often assumed wrongly that muscle relaxants are responsible for respiratory depression at the end of an operation. Such an assumption can be documented only when impairment of neuromuscular transmission can be demonstrated.

The only satisfactory method of monitoring neuromuscular function is stimulation of an accessible peripheral motor nerve and observation or measurement of the response of the skeletal muscle supplied by this nerve.

The earliest attempts to employ motor nerve stimulation for monitoring neuromuscular function in man date back to 1941.<sup>26</sup> Harvey and Masland<sup>26</sup> realized the importance of delivering to the peripheral motor nerve an electrical stimulus of sufficient intensity to cause all nerve fibers to respond but not strong enough to cause repetitive firing of the nerve. They applied an electrical stimulus to the ulnar nerve at the elbow. The intensity of the pulse was gradually increased until the muscle action potential recorded from the abductor digiti minimi (the hypothenar eminence) reached a maximum amplitude. The stimulus was then increased by 10-15 per cent to ensure supramaximal stimulation. A single supramaximal stimulus applied to a motor nerve evokes a single muscle twitch in the muscles supplied by this nerve. The recorded response is the mechanical or electrical manifestation of the activated contractile apparatus.

The extent of shortening or the *tension* developed by a single muscle fiber is independent of the nature of the stimulus. It is an "all-or-none" phenomenon. Augmented force of muscle contraction is produced by a graded increase in the number of muscle fibers contracting and depends on the previous state of that muscle. Measurement of the force of muscle contraction or the compound action potential resulting from indirect stimulation is primarily an index of the number of fibers that have been caused to contract. Based on the "all-or-none" law and assuming that conduction along the motor nerve is intact, propagation of an electrical stimulus must result in contraction of all muscle fibers supplied by the activated nerve fibers if neuromuscular transmission is not impaired.

Tension measurements in response to motor nerve stimulation have been used by several investigators. Some stimulated the ulnar nerve and recorded the twitch produced in either the fifth finger<sup>27</sup> or the fourth and fifth fingers.<sup>28</sup> The response in either of these cases, however, cannot be considered isometric. Others have measured the evoked twitch response resulting from adduction of the thumb.<sup>16,29-31</sup> Mapleson and Mushin<sup>32</sup> stimulated the median nerve and recorded the force of contraction of the muscles of the thumb.

Evoked electromyography (EMG) in man has been used to measure neuromuscular function and has been much preferred over tension measurements by some investigators.<sup>1,8</sup>

#### IV. Methods of Measurement of Neuromuscular Function (Evoked Responses)

In contrast to volitional movements, evoked responses do not require the cooperation of the individual and thus are suitable for use in the unconscious patient. Furthermore, supramaximal electrical nerve stimuli can be used, and hence the muscular responses are reproducible. The resulting activation of the muscle fibers can be measured either mechanically (tension response) or electrically (evoked EMG).

Proper stimulus characteristics are necessary,<sup>8</sup> since an excessive stimulus duration or inappropriate waveform can cause repetitive nerve firing,<sup>33</sup> resulting in faulty interpretation. Ideally, it should be a rectangular or square pulse of a duration not exceeding 0.2 msec. In addition, supramaximal stimuli are necessary to ensure full activation of all the nerve (and hence muscle) fibers.

##### A. Tension Measurements

The hand muscles are used most commonly for mechanical twitch measurement, especially the adductor of the thumb. The great advantage in the use of the adductor pollicis is that under appropriate conditions, it is the only muscle acting on the thumb<sup>34</sup> supplied by the ulnar nerve, and hence it approaches the single-muscle precision of the experimental nerve-muscle preparation. Stimulating electrodes are placed on the surface of the skin or percutaneously along the ulnar nerve at either the wrist or the elbow. The evoked tension of the adductor pollicis in response to ulnar nerve stimulation is recorded using a force-displacement transducer. Epstein and Epstein<sup>8</sup> have emphasized the importance of transducer mounting and some specific mechanical characteristics for the interpretation of results. The transducers commonly used (Grass FT-03 and FT-10) are extremely sensitive to the direction of the applied force. Few investigators have consistently posi-

tioned these transducers with this consideration in mind. Small shifts in the angle of applied force can produce significant changes in the output of these transducers. The correct positioning of thumb, transducer, and arm, in our practice, is shown in figure 1.

During both tetanic electrical stimulation of the ulnar nerve and voluntary effort, the maximum force of adduction of the thumb of the normal adult volunteer is about 8 kg.<sup>34</sup> In patients anesthetized with nitrous oxide, oxygen and halothane or methoxyflurane, Freund and Merati<sup>35</sup> found the mean measured force of adduction of the thumb in response to tetanic electrical stimulation to be  $5.6 \pm 1.4$  kg (mean  $\pm$  SE). Both are well above the capacity (2.2 kg) of the Grass FT-03 transducer. Epstein and Epstein<sup>8</sup> and the above-mentioned authors<sup>35</sup> have pointed out that if the FT-03 transducer is used, the true control tetanic tension cannot be recorded since the transducer is overloaded. Therefore, during recovery from neuromuscular blockade tetanic tension may appear to have recovered fully and the tetanic response may appear well sustained when fatigue is still present, simply because of transducer overload. This does not occur when the Grass FT-10, with a capacity of 10 kg, is used. Another consideration is the initial resting tension of the muscle. With the use of certain transducer holders, it is possible that there is little or no resting tension placed on the thumb. In such cases, the experimental conditions do not approach isometric recording and such data may produce erroneous results. On the other hand, Donlon *et al.*<sup>†</sup> have found that the resting tension of the adductor pollicis brevis should be at least 200 g for maximum evoked twitch tension to develop. However, varying the resting tension from 50 to 300 g did not result in any difference in the cumulative dose-response curve for gallamine. Furthermore, use of the biphasic stimulus from a Block-Aid<sup>®</sup> monitor did not alter the dose-response relationship, although the absolute twitch height was higher in the former

† Donlon JV, Ali HH, Savarese JJ: The effect of resting tension and biphasic stimulation on dose response curves for neuromuscular blocking agents. Abstracts of Scientific Papers, ASA Annual Meeting, 1974, pp 123-124.

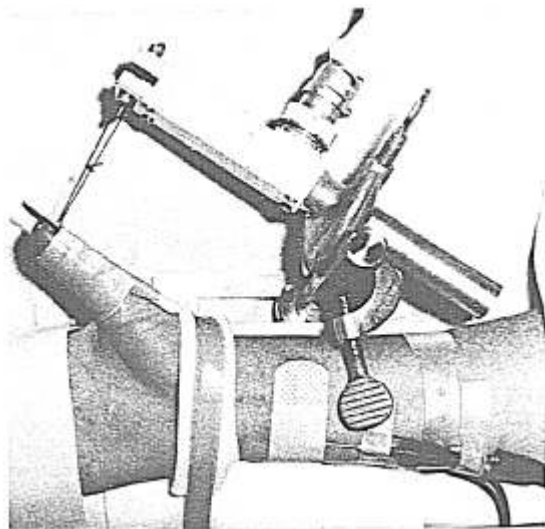

FIG. 1. The hand and forearm immobilized for recording of thumb adduction in a special arm board. The transducer is aligned parallel to the fully abducted thumb. The direction of thumb adduction is perpendicular to the transducer and corresponds to the direction of displacement of the transducer cantilever.

case than that which resulted from square-wave stimulation by a Grass S-88 stimulator. Therefore, there is little reason to doubt the reliability of prior clinical studies that have not standardized resting tension or have employed biphasic stimulation.

### B. Electromyographic Measurements

Evoked EMG measurements can be accomplished by supramaximal stimulation of the ulnar nerve at the elbow and recording of the compound muscle action potential via two surface or needle electrodes applied to the adductor pollicis brevis (thenar EMG),<sup>2,9</sup> the abductor digiti minimi (hypothenar EMG),<sup>4,9,26</sup> or the first dorsal interosseous muscle of the hand.<sup>26</sup> The active or negative electrode is placed over the motor point of the muscle to be studied and the indifferent electrode at the tendon of insertion of the respective muscle. A third and larger plate (ground electrode) should be interposed between the stimulating and recording electrodes<sup>37,38</sup> to reduce the 60-Hz interference. Movement

artefact is reduced by securing the hand and forearm in a suitable splint.

On stimulation of the motor nerve, a full motor unit action potential is recorded. If the surface electrodes are correctly placed on the motor point, a number of biphasic motor unit action potentials are recorded as a single large summated compound action potential. The stimulus artefact detected before the beginning of the action potential represents the arrival of the electrical pulse. The time interval between the stimulus artefact and the beginning of the action potential represents the time taken for the stimulus to travel down the nerve from the point of stimulation to the motor end-plate. If the nerve is stimulated at two different points (e.g., the ulnar nerve at the elbow and wrist) the difference in the time intervals is a measure of conduction rate along that nerve. By using electromyography, problems with transducer fixation, orientation and overload may be avoided. The latter are important factors to be considered when measuring the tension response.<sup>39</sup> On the other hand, the EMG is not

without technical difficulties. Despite the availability of modern preamplifiers and storage oscilloscopes, measuring the evoked EMG is difficult and expensive, especially for everyday clinical monitoring of neuromuscular function. Epstein *et al.*<sup>40</sup> have recommended that the EMG be transcribed after amplification on a high-quality FM instrumentation tape recorder. Playback and writeout on a polygraph can be obtained later, thus cutting down tremendously on the cost of recording high-speed events. Their system includes laboratory instrumentation generally available which need not be dedicated solely to survey of neuromuscular function. We believe that this system is more suited for use as a research tool than for use as a clinical monitoring system.

Recently, Epstein and Epstein<sup>41</sup> have described a more compact, less expensive, and fully automatic system which has been devised using solid-state electronic storage technique. This method allows the direct writing of individual EMG twitch responses. The recording is thus available during the course of anesthetic administration. These authors believe that this technique may prove to be a clinically useful tool in the evaluation of muscle relaxation.

### V. Clinical Utility of Various Evoked Responses

The pattern of evoked muscle responses to changes in the frequency of stimulation identifies and quantifies neuromuscular block. This method measures the evoked muscle response to:

- A. Single repeated supramaximal nerve stimuli at slow rates (0.1–0.2 Hz, the single twitch).
- B. Tetanic or high-frequency rates of stimulation at 50 or more Hz (tetanus).
- C. Posttetanic single repeated stimuli (posttetanic potentiation).
- D. Train-of-four stimulation at a low frequency (2 Hz for 2 seconds).

The resultant pattern depends upon the factors that control the synthesis, mobilization and release of the chemical transmitter acetylcholine, as outlined in a subsequent section.

#### A. The Responses to Single Repeated Supramaximal Motor Nerve Stimuli (Single Twitch)

Various investigators have used stimulus frequencies ranging from 0.1 to 1.0 Hz. Since the extent of nondepolarizing neuromuscular blockade is frequency-dependent,<sup>42–47</sup> the reported results will vary accordingly, and a standard stimulus frequency should be advocated for this purpose. The single twitch is useful as an approach to the comparative study of neuromuscular blocking drugs. A control response is obtained (fig. 2) and the percentage change from control establishes the onset of action and potency of the drug. Duration of action is indicated by the time required for recovery of the evoked twitch response to control level. Single stimuli detect relatively high degrees of curarization, and may be helpful in deciding whether postoperative apnea is peripheral or central in origin.

In clinical situations, unless monitoring is performed routinely, the control level of the twitch response will not be available when postoperative muscle weakness is suspected. Moreover, complete stability of recording over a period of hours cannot be guaranteed. It is questionable whether the measured tension response is the same as the evoked electrical response. It was shown that the muscle action potential amplitude could not be quantitatively related to the tension developed in the muscle,<sup>48,49</sup> while the integrated EMG was found to correlate linearly with the tension developed during voluntary isometric contraction.<sup>50,51</sup> Epstein and Epstein<sup>4</sup> noticed that despite a roughly linear relation between depressions of the evoked mechanical twitch and the EMG, the two were not depressed equally. There is dissociation of the electrical and mechanical events in terms of the extents of blocks produced by succinylcholine and *d*-tubocurarine.<sup>9</sup> Accordingly, the mechanical twitch response is less sensitive to succinylcholine than the thenar or hypotenar EMG. On the other hand, with *d*-tubocurarine the mechanical twitch response is more sensitive than the thenar or hypotenar EMG. Thus, assessment of recovery from tubocurarine by EMG monitoring may indicate complete neuromuscular recovery upon the return of the response to control levels. On the contrary,

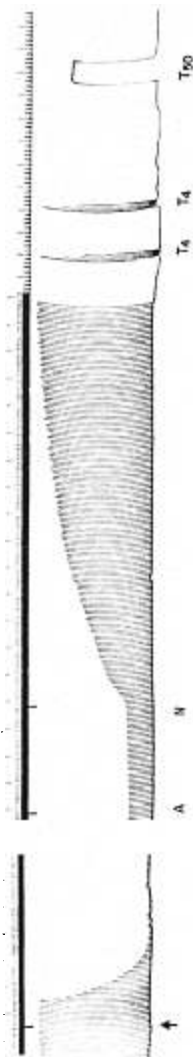

FIG. 2. Correlation of the single adductor twitch of the thumb, evoked at 0.15 Hz, the train-of-four (2 Hz), and tetanus (50 Hz) for 5 seconds during reversal of pancuronium neuromuscular blockade in a patient under nitrous oxide-narcotic anesthesia. Time scale during single twitch recording = minutes and during train-of-four and tetanus = seconds. The tetanic response was recorded at 1/5 the sensitivity used for the twitch, using a Grass FT-10 transducer. All drugs were given intravenously. At the arrow pancuronium, 0.1 mg/kg. Ninety minutes later, A, atropine, 1.5 mg, followed at X by neostigmine, 3.0 mg. Note that after the single twitch response had returned to the control height (15 minutes after administration of neostigmine), tetanus ( $T_{50}$ ) was well sustained. The calculated train-of-four ratio ( $T_4$ , the ratio of the height of the fourth to the first twitch), however, was only 70 per cent. This indicates that train-of-four stimulation is a more sensitive index of residual nondepolarizing block than either the single twitch or 50-Hz tetanus.

the information obtained from the mechanical twitch response may indicate substantial muscle weakness; the converse is true of succinylcholine. Botelho,<sup>32</sup> who studied simultaneously the evoked mechanical and electrical activities of partially curarized human muscle, found that measurement of isometric muscle contraction evoked by motor nerve stimulation provided a more accurate index of neuromuscular block than measurement of the muscle action potential associated with contraction.

### B. The Response to Tetanic Stimulation

Paton and Waud<sup>33</sup> found that in response to single stimuli delivered every 10 seconds, three-fourths of the postsynaptic receptors must be occluded before neuromuscular transmission begins to fail. This can be interpreted as indicating that only one quarter of the receptor pool is necessary for normal transmission at low rates of stimulation, or that the output of transmitter acetylcholine (ACh) is many times greater than necessary to evoke a propagated response in every muscle fiber, or finally, that a high "margin of safety" exists at the neuromuscular synapse.<sup>33</sup> In other words, the end-plate potential is more than adequate to trigger a propagated response over a wide range of frequencies of stimulation, hence the response to tetanic stimulation is sustained at high frequencies during normal neuromuscular transmission despite the decrement in ACh release. When the margin of safety is decreased by disease of the myoneural junction (e.g., myasthenia gravis) or the use of curare-like drugs, then the decrease in ACh output during repetitive nerve stimulation will be manifested by fade or non-sustained response to tetanic stimulation (fig. 3). The extent of tetanic fade depends upon the frequency and duration of stimulation. Gissen and Katz<sup>34</sup> have found that the failure of sustained response to tetanic stimulation at various frequencies is a more sensitive index of neuromuscular blockade than the single twitch or post-tetanic potentiation. During partial neuromuscular blockade with as little as 5 mg *d*-tubocurarine during administration of nitrous oxide-oxygen with 0.5–2 per cent halothane, tetanus is not sustained at the higher stimulus

FIG. 3. Tetanic fade and post-tetanic potentiation during partial nondepolarizing neuromuscular blockade produced by pancuronium in a patient during nitrous oxide-narcotic anesthesia. Twitches (0.15 Hz) and tetanus of the thumb were evoked indirectly via the ulnar nerve. At  $T_{50}$  tetanic stimulation was applied at 50 Hz for 5 seconds. There is fade of the tetanic response and marked posttetanic potentiation (PTP) of the twitch, which stabilizes after the period of potentiation at approximately twice the height of the pretetanic twitch. At  $T_1$  train-of-four stimulation was carried out. Only the first response in the train is evoked at this depth of block (90 per cent depression of the single twitch).

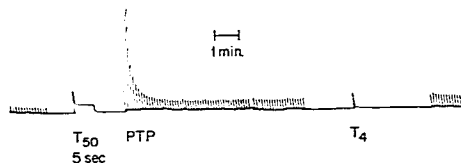

frequencies (100–200 Hz) even though twitch may have returned to control levels. In the presence of potent anesthetics (enflurane, halothane, methoxyflurane, isoflurane) fade has been observed during high-frequency tetanus (200–300 Hz) even without the use of muscle relaxant drugs.<sup>25,26</sup> Thus the response to high-frequency tetanus is difficult to interpret in the presence of these anesthetics. Moreover, extremely high-frequency tetanic stimulation (>50 Hz) is unphysiologic, since during maximal voluntary effort no more than 50 Hz are required to match a comparable evoked response.<sup>24</sup> Rapid tetanus increases the average neuromuscular refractory period, and it is possible that part of the fade seen is secondary to decreased ability of the muscle to respond rapidly during the latter part of tetanus, rather than to receptor blockade by relaxant drugs.<sup>8</sup> The report of Waud and Waud<sup>27</sup> correlating the frequency of stimulation to receptor occlusion is less pertinent to the clinical situation. The concept of the margin of safety and receptor occlusion illustrates the extent of interference with the synaptic mechanism that can exist without failure of transmission. The assumption has been made<sup>23</sup> that acetylcholine and blocking drugs such as *d*-tubocurarine interact with the receptor pool according to the laws of mass action, as do stimulants and antagonists at other receptor sites. The measurement of receptor occupancy applies only to the muscles studied, and by no means can one say that the results obtained in animals apply directly to human muscles. A low-frequency pattern of nerve stimulation (2 Hz) will reveal fade at a time when the mechanical response to high-frequency tetanus (50 Hz) is well sustained

in the human adductor pollicis brevis muscle (fig. 2). The authors believe that the train-of-four technique deserves further clinical study to substantiate this concept.

### C. Posttetanic Potentiation (PTP)

Mobilization and enhanced synthesis of ACh continue during and after cessation of tetanic stimulation, so that following the end of a tetanus, there is an increase in the readily releasable fraction and subsequently the quantal content. Thus, in the posttetanic period the quantal content exceeds that in the pretetanic control period. In the absence of any decrease in the margin of safety, this increased quantal output will fail to cause PTP because all the muscle fibers are maximally excited by each single stimulus. However, with curare-induced paralysis, the pretetanic twitch is submaximal. With the increased posttetanic quantal content, a larger number of muscle fibers may be excited by nerve stimulation, thus causing PTP (fig. 3). The latter can occur in the control period in the absence of neuromuscular block. This has been observed by several investigators when monitoring the evoked mechanical response.<sup>2,9,27,28</sup> There is no control electromyographic PTP before curarization, because neuromuscular transmission is intact and all the muscle fibers depolarize in response to the single supramaximal indirect stimulus before the tetanus. In this case the phenomenon of control mechanical PTP seems to be explained either by a change in the contractile response of the muscle or by repetitive firing of nerve or muscle<sup>29,30</sup> and is not indicative of a change in neuromuscular transmission. Epstein and Ep-



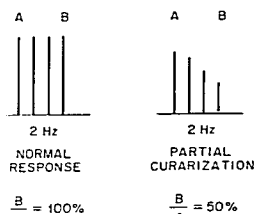

FIG. 4. Diagram representing responses to train-of-four stimuli at 2 Hz. *Left*, normal response before curarization. The height of B is equal to the height of A and the ratio of B to A expressed as a percentage is 100 per cent. *Right*, partial curarization. The ratio of the height of B to A is 50 per cent.

stein\* consider that the existence of electromyographic PTP establishes the diagnosis of residual depression of neuromuscular transmission, and they believe that it may be a clinically useful monitor of residual curarization. These investigators found that mechanical PTP is not as useful as electromyographic PTP. PTP is markedly influenced by the duration and frequency of the preceding tetanus, as well as by the posttetanic interval.<sup>61</sup>

#### D. Train-of-four stimulation

From the foregoing discussion, it might appear that there is controversy in the interpretation of results obtained from the responses to single stimuli, tetanic rates of stimulation, and posttetanic single repeated stimuli (posttetanic potentiation). Few will argue that the ability to estimate quantita-

tively the degree of neuromuscular block without the need for a control response is desirable, particularly if residual curarization is suspected. Ali *et al.*<sup>36,47,62</sup> have attempted to quantify the degree of residual curare block by describing an additional method for quantitative measurement of the degree of nondepolarizing neuromuscular blockade. This method utilizes a short train of four supramaximal stimuli applied to the ulnar nerve at a frequency of 2 Hz. Each train is repeated not more frequently than once every 10 seconds, either intermittently or continuously. The ratio of the amplitude of the fourth evoked mechanical or electromyographic response to the amplitude of the first response in the same train as shown in figure 4 appeared to provide a convenient method for the assessment of neuromuscular transmission. This method does not require a previous control response and provides a means for quantifying residual curarization after a nondepolarizing relaxant has been given. It can be applied to situations before and after attempted reversal of the neuromuscular block with anticholinesterases. Four stimuli were chosen since it was found that during partial curarization the fourth response was maximally depressed, after which the single twitch response either leveled off or increased slightly in amplitude (fig. 5). In addition, the individual responses can be easily separated. The low frequency (*i.e.*, 2 Hz) is rapid enough to produce significant depletion of the immediately available store of ACh and yet slow enough to prevent transmitter facilitation. There was a highly significant positive linear association ( $P$

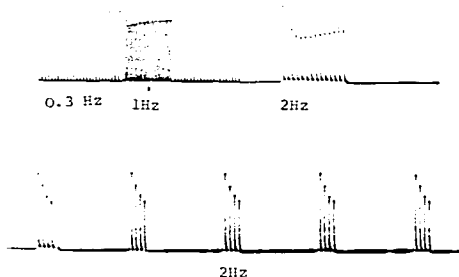

FIG. 5. Evoked mechanical twitch responses at three frequencies (0.3, 1.0, and 2.0 Hz) during partial *d*-tubocurarine neuromuscular blockade. Note in the upper panel the rapid decline of the twitch as the frequency is increased from 0.3 to 1.0 Hz. At 2 Hz continued fade of the twitch does not occur; it begins to rise slightly after the fourth response. The lower panel shows five responses to trains of four stimuli at 2 Hz for 2 seconds (train-of-four stimulation). The interval between trains is 10 seconds.

FIG. 6. Correlation between the train-of-four value (*abscissa*) and respiratory measurements (*ordinate*) in awake human subjects partially paralyzed by *d*-tubocurarine. There is a significant change in inspiratory force only when the train-of-four value falls to 60 per cent (or lower) and a significant change in capacity only when the train-of-four value is 70 per cent or lower. Data by courtesy: Ali *et al.*<sup>64</sup> and *British Journal of Anaesthesia*.

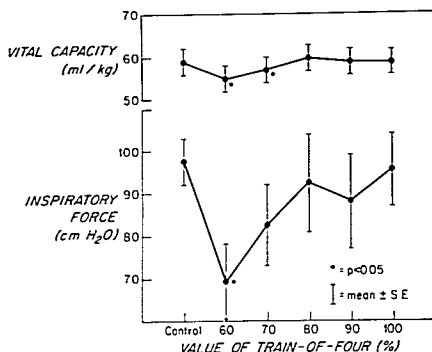

< 0.001) between the ratio of the fourth to the first response in the train and the ratio of the first response in the same train to the control response.<sup>62</sup> The train-of-four ratio correlates well with a simple clinical test commonly employed for assessment of clinical recovery from nondepolarizing neuromuscular blocking drugs (*i.e.*, head lift). With a ratio above 60 per cent, patients were able to sustain head lift for a period of 3 seconds or more.<sup>36</sup> A mean ( $\pm$ SD) ratio of  $74 \pm 5$  per cent was found to correlate well with signs of adequate clinical recovery<sup>63</sup> from *d*-tubocurarine block in anesthetized patients receiving nitrous oxide-oxygen and a narcotic supplement. The clinical signs of muscle function included the ability to open the eyes widely, cough, protrude the tongue, sustain head lift for 5 seconds, develop a vital capacity of at least 15–20 ml/kg, and sustain a tetanus of 30–50 Hz for 5 seconds. Another study<sup>64</sup> in conscious unmedicated volunteers showed that at a train-of-four ratio of 60 per cent or higher, the changes in the measured respiratory variables (*i.e.*, the tidal volume, vital capacity, inspiratory force, and peak expiratory flow rate) were negligible, since the lowest values measured were well above the clinically acceptable limits (fig. 6). A train-of-four ratio of 70–75 per cent coincides with the return to the control level of the single twitch response evoked at 0.15 Hz and a sustained mechanical response to tetanic stimulation at 50 Hz for 5 seconds (Ali, Savarese, *et al.*, unpublished

data). Figure 2 shows the relation between the single twitch, the train-of-four response, and the tetanic response after reversal of nondepolarizing neuromuscular block. Electromyographically, a train-of-four ratio of 75 per cent correlated well with adequate clinical recovery, including sustained head lift for 5 seconds or more<sup>36</sup> (fig. 7).

The train-of-four pattern of stimulation, in addition, causes much less discomfort to the conscious patient recovering from anesthesia than tetanic stimulation at 30 Hz or more. Furthermore, it does not affect the subsequent pattern of recovery from neuromuscular blockade as does tetanic stimulation (fig. 3). The ratio of the train-of-four is also a valuable guide for quantitative assessment of residual nondepolarizing neuromuscular block in infants and children, as demonstrated by correlation with single-twitch depression ( $r = 0.93$ ,  $P < 0.001$ ).<sup>65</sup>

Lee<sup>66</sup> has correlated the movement of the fifth finger with recorded thumb adduction in response to train-of-four stimulation and utilized the finger movements as a method of estimating the degree of *d*-tubocurarine block. He found that during the onset of block, the fourth twitch in the train was eliminated at approximately 75 per cent depression of the first twitch compared with control. The third twitch in the train was abolished at 80 per cent depression of the first twitch, while the second twitch in the train became undetectable at about 90 per cent block of the first response.

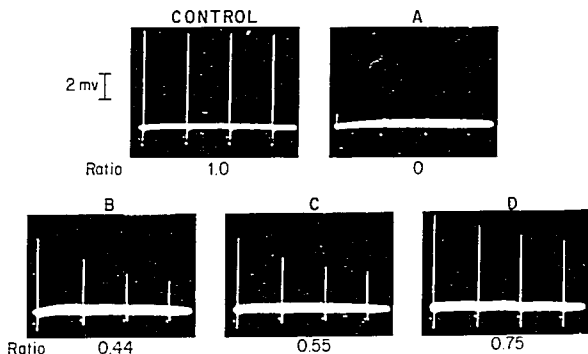

FIG. 7. Evoked electromyographic responses to train-of-four stimulation (2 Hz for 2 seconds). *Upper panel*, control response before *d*-tubocurarine. The ratio of the fourth to the first potential is 1.0. *A*, 50 minutes after *d*-tubocurarine, 0.6 mg/kg, and just prior to reversal with neostigmine, note a barely visible first response and absence of the fourth response. The ratio is thus zero. *Lower panel*, *B* through *D*: 5, 10, and 20 minutes after atropine, 0.03 mg/kg, and neostigmine, 0.07 mg/kg, note an increase in the ratio from zero to 0.75.

When all four twitches in the train were absent, 100 per cent or complete block was present (fig. 8). Thus, for clinical purposes, merely counting the twitches in the train-of-four response quantifies both the extent of neuromuscular blockade and the dose of muscle relaxant required to achieve a certain degree of relaxation. This method affords a means by which the anesthesiologist can predict the prospects of adequate reversal of nondepolarizing blockade by anticholinesterase drugs, since reversal at 75 per cent twitch depres-

sion (25 per cent twitch height) is usually complete within 10–15 minutes.<sup>67</sup>

For practical purposes, the train-of-four technique can provide the following clinical information:

1. An estimate of the dose of nondepolarizing relaxant drugs necessary to achieve 90–95 per cent twitch suppression (satisfactory surgical relaxation during nitrous oxide anesthesia<sup>1,67–71</sup>).
2. Prediction of adequate reversal of nonde-

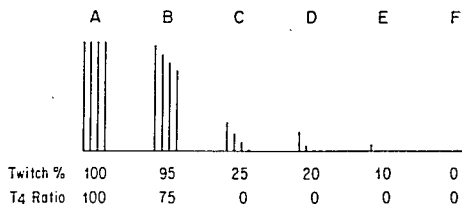

FIG. 8. Correlation of the single twitch height at a frequency of 0.1 Hz (the first response in the train of four responses) and the train-of-four ratio ( $T_4$ , the calculated ratio of the height of the fourth to the first response in the train). *A*, control response. *B*, when the single twitch is 95 per cent of control, the train-of-four ratio is 75 per cent or less. *C* through *E*, disappearance of the fourth twitch, the third and fourth twitches, and the second, third, and fourth twitches in the train corresponds to 25, 20 and 10 per cent single twitch height, respectively.<sup>66</sup> and the ratio of the train-of-four is zero. *F*, when all four responses in the train are abolished, the depth of block is the same as indicated by the absence of the single twitch.

FIG. 9. A view of the digital neuromuscular transmission analyzer. The hand and forearm are immobilized in an arm board and the thumb is aligned in full abduction to a semiconductor force transducer.

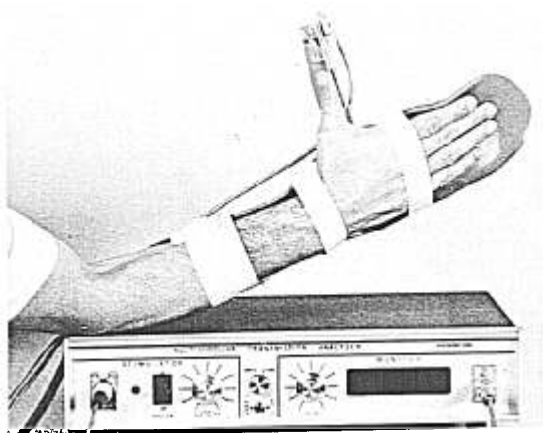

polarizing block following administration of anticholinesterases.

3. Assessment of residual curarization and adequacy of recovery from nondepolarizing neuromuscular blockade.
4. A ratio of the fourth/first response of greater than 0.70 correlates well with clinical tests of adequacy of reversal.
5. Diagnosis and follow-up<sup>12,13</sup> of the course of phase II block following depolarizing relaxants.

Ali *et al.*<sup>4</sup> developed a self-contained monitor to measure the response to train-of-four stimulation in clinical situations. It includes a nerve stimulator that delivers the proper impulse pattern (*i.e.*, train of four stimuli at 2 Hz, each repeated either intermittently or continuously once every 10 seconds) and a twitch-response analyzer, consisting of a thumb force transducer assembled in a specially designed armboard and digital read-out circuit that calculates and displays the ratio of the fourth to the first responses<sup>12,13</sup> (fig. 9). This monitor is currently used in the operating and acute care suites at the

Massachusetts General Hospital. A small portable nerve stimulator that delivers train-of-four stimuli is being used to estimate the dose requirements of nondepolarizing relaxants to provide adequate surgical relaxation.

## VI. Integrated Electromyography (IEMG)

A final method for monitoring relaxation of the abdominal wall musculature depends upon integrating the spontaneous electrical activity of the latter muscle group.

Fink<sup>22</sup> used the spontaneous EMG of the abdominal muscles as a guide to management of muscle relaxation. The EMG activity can be obtained by inserting needle electrodes into the oblique transverse group of abdominal muscles. The EMG can be observed on an oscilloscope or the electrical activity may be filtered, amplified, rectified and integrated, thus providing an integrated electromyogram (IEMG). The latter measures spontaneous activity of the abdominal muscles, which depends upon the afferent input to the CNS, the efferent motor nerve transmission to the muscle, neuromuscular transmission, and normal electrical and mechanical muscular function. The IEMG is thus affected by general anesthetics, local anesthetics, neuromuscular blockers, surgical stimulation, and

<sup>4</sup> Ali HH, Cywinski JK, Cintron R, et al: Digital neuromuscular transmission analyzer: A clinical evaluation. Abstracts of Scientific Papers, ASA Annual Meeting, 1972, p 219.

hyperventilation.<sup>5,73</sup> Simultaneous monitoring of both twitch response and IEMG was found to be valuable in research studies, but technical difficulties associated with the latter preclude its routine clinical use.<sup>74</sup>

### VII. Correlation of Evoked Responses with Clinical Observations

Although the desired clinical effect of neuromuscular blocking drugs is "relaxation," most clinical studies quantitate this result in terms of twitch suppression, train-of-four value, and per cent tetanic fade. These evoked responses permit precise quantification of depth and duration of neuromuscular blockade and facilitate comparison of various drugs. Certain well-recognized stages of clinical relaxation occur within reasonably well-defined limits of the evoked responses.<sup>1,65-71</sup> Figures 2, 8 and 10 attempt to summarize these data, to allow the clinician not accustomed to twitch and train-of-four values to interpret the data within his own frame of reference.

At 95 per cent or more twitch suppression, jaw and laryngeal paralysis is sufficient for reasonably smooth laryngoscopy and endotracheal intubation.<sup>68,75</sup> Ninety per cent block provides excellent abdominal relaxation with nitrous oxide-narcotic anesthesia.<sup>67,68</sup> When potent anesthetic vapors are employed, 75 per cent twitch depression results in similar surgical relaxation.<sup>1,65,67,69-70</sup> The abdominal musculature generally feels "tight" at 25 per cent or greater twitch height, but the head cannot usually be lifted until the twitch height is at least 90 per cent of control (Savarese JJ, Ali HH, unpublished observation).

The clinical use of a nerve stimulator can provide confirmation of the adequacy of relaxation without the actual recording of thumb twitch. Observation of finger movements in response to twitch stimulation during graded administration of relaxants permits titration of dosage until the twitch is barely visible. This easily observed end-point corresponds to 95-98 per cent measured twitch depression at 0.1-0.2 Hz.<sup>68</sup> Lee<sup>66</sup> has correlated the disappearance of the fourth, third, and second responses in train-of-four stimulation with single twitch heights of 25, 20 and 10 per cent of control (see train-of-four stimulation, section

V), thus allowing visual estimation of deep levels of neuromuscular block.

When recovery from neuromuscular blockade is to be evaluated clinically, adequacy of ventilation and muscular strength are the important criteria. Again, the evoked responses define precisely the level of neuromuscular function necessary to perform the clinical tests satisfactorily in the absence of patient cooperation<sup>1,41,54,62,64,67</sup> (see figs. 2, 8, 10). Thus, a train-of-four value of 75 per cent or more ensures an adequate tidal volume and vital capacity and an inspiratory force of at least 15-20 ml/kg and 20-25 cm H<sub>2</sub>O, respectively.<sup>65,64,76</sup> The same applies to a sustained tetanus at 50 Hz or more.<sup>54,67,77</sup> The return of the evoked responses to these levels assures normal grip strength, sustained head lift for at least 5 seconds, tongue protrusion, upper eyelid tone, jaw tone, and other clinical criteria.

### VIII. Anatomy of the Neuromuscular Junction and Physiology of Neuromuscular Transmission

#### A. Anatomy

The myoneural junction consists of two structures: the motor nerve terminal and the motor end-plate region of the skeletal muscle membrane (fig. 11). These structures are separated by a gap, the synaptic cleft, which is filled with extracellular fluid. The motor nerve terminal is nonmyelinated, and certain subcellular structures involved with energy production (mitochondria), protein synthesis, and acetylcholine synthesis and storage (endoplasmic reticulum and synaptic vesicles), and calcium binding and storage are prominent in the terminal axoplasm. The motor end-plate is a uniquely chemosensitive, highly folded area of muscle membrane located opposite the motor nerve terminal. The surrounding sarcoplasm is also richly invested with mitochondria and calcium-binding and storage sites. A number of reviews may be consulted for further anatomic details.<sup>78-81</sup>

Several important subsites are located at the motor nerve terminal and the motor end-plate. These include the cholinergic receptor, the enzymes acetylcholinesterase and plasma cholinesterase, and an acetylcholine-

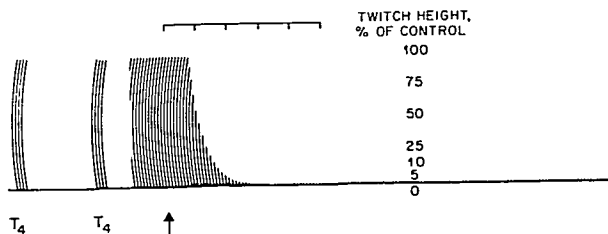

FIG. 10. Correlation of twitch height, clinical relaxation, and ventilation at increasing depths of neuromuscular blockade. A recording of evoked thumb adduction was made in a patient during nitrous oxide-narcotic-barbiturate anesthesia. The single twitch was evoked at 0.15 Hz. At  $T_4$ , train-of-four stimulation (2 Hz for 2 seconds) was carried out. Time scale (minutes) at top. At the arrow, pancuronium, 0.1 mg/kg, was given intravenously, producing 99 per cent twitch suppression. The following table lists the clinical conditions that might have been found at various twitch heights, if the block were held constant at each level.

| Twitch Height (Per Cent of Control) | Clinical Relaxation                                                | Ventilation                                                                    | References                                                   |
|-------------------------------------|--------------------------------------------------------------------|--------------------------------------------------------------------------------|--------------------------------------------------------------|
| 100                                 | None (train-of-four > 70, tetanus sustained at 50 Hz)              | Normal                                                                         | 63, 64, 77                                                   |
| 75                                  | Poor, but head lift inadequate                                     | Slightly to moderately diminished vital capacity                               | 64, Ali <i>et al.</i> *                                      |
| 50                                  | Fair                                                               | Moderately to markedly diminished vital capacity; tidal volume may be adequate | 67, 68                                                       |
| 25                                  | Good with potent inhalation anesthetics                            | Tidal volume diminished                                                        | 65, 67, 260                                                  |
| 10                                  | Good with balanced technique                                       | Tidal volume inadequate                                                        | 67, 69-71                                                    |
| 5                                   | Very good; adequate for tracheal intubation under light anesthesia | Some diaphragmatic motion possible                                             | 68-71                                                        |
| 0                                   | Excellent; very good for tracheal intubation                       | Apnea                                                                          | 68-71, 75<br>Ali <i>et al.</i> *<br>Savarese <i>et al.</i> † |

\* Ali HH, Savarese JJ, Donlon JV, et al: Comparative study between BWY 100 (compound AA 136). "A new short acting nondepolarizing neuromuscular blocking agent." Pancuronium and *d*-tubocurarine. Abstracts of Scientific Papers. ASA meeting, 1975, pp 195-196.

† Savarese JJ, Ali HH, Donlon JV, et al: The clinical effects of BWY 100 (compound AA-136). A new short acting nondepolarizing neuromuscular blocking agent: Correlation with experimental pharmacology. Abstracts of Scientific Papers. ASA meeting, 1975, pp 193-194.

sensitive area at the motor nerve terminal. These specialized sites interact with and modify the action of acetylcholine, the normal neuromuscular transmitter. They are called *cholinergic sites*.<sup>22</sup> Their locations are shown in figure 11.

#### B. Synthesis, Storage and Release of Acetylcholine

Acetylcholine (ACh) is synthesized within the motor nerve<sup>23</sup> following acetylation of choline by the enzyme choline acetyltrans-

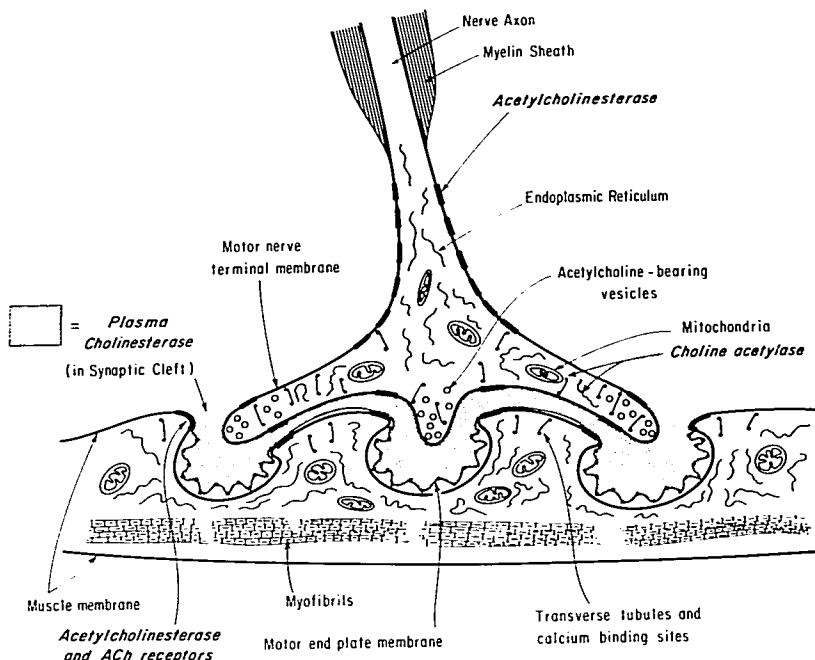

FIG. 11. Schematic representation of the neuromuscular junction. The locations of important acetylcholine-binding sites (cholinceptive sites) are shown in italics.

ferase (choline acetylase) and acetyl coenzyme A.<sup>84</sup> The synthesized acetylcholine is transferred to and stored in *synaptic vesicles* to be released from the latter into the synaptic cleft in uniform amounts called "quanta."<sup>85,86</sup> In the absence of stimulation, the end-plate region of the muscle fiber displays spontaneous electrical activity in the form of discrete, randomly occurring "miniature" end-plate potentials (mepp). Each mepp is of the order of 0.5–1.5 mv in amplitude, but in other respects resembles the much larger end-plate potential evoked by the nerve impulse.<sup>87</sup> Each mepp probably arises from the impact upon the motor end-plate of a single quantum of ACh spontaneously discharged by the adjacent nerve terminal.<sup>88</sup> At least one thousand mole-

cules of ACh are contained within an elementary packet or quantum, possibly more  $[(4-5 \times 10^3)^{84} \text{ or } (10^3)^{89}]$ . The normal end-plate potential is made up of a statistical fusion of quantal components, identical to the spontaneously occurring units (mepp's). The nerve impulse in effect facilitates or, in statistical terms, raises the probability of events that occur all the time at a low rate, and instead of an average of one packet per second, a few hundred packets, or quanta of acetylcholine, are released within a millisecond. Calcium ions must be present in the external medium for effective depolarization. Katz and Miledi<sup>90-92</sup> have concluded that calcium is the only immediate ionic requirement for depolarization to evoke acetylcholine release.

Depolarization opens specific calcium gates in the terminal axon membrane and leads to an influx of calcium ions.<sup>23</sup> Having reached the internal surface of the axon membrane, calcium ions then initiate the quantal release reaction. Katz<sup>28</sup> has postulated that the quanta of ACh molecules are enclosed within synaptic vesicles that undergo frequent transient collisions with the axon membrane. Calcium ions bring about attachment and local fusion between vesicular and axonal membranes, followed by an all-or-none discharge of the vesicular content into the synaptic cleft.

The changes in end-plate potential amplitude that occur when stimulus frequency is altered can best be understood by reference to a simple model of ACh release. Birks and McIntosh<sup>29</sup> have characterized their findings from ganglion perfusion experiments in terms of a model of presynaptic storage and release of ACh. Elmqvist and Quastel<sup>31</sup> have adapted this model to interpret their results obtained from human intercostal muscles. This model is described below in simplified fashion to illustrate the results obtained from twitch tension or electromyographic measurements.

The presynaptic store of ACh consists of two fractions:

1. A small part of the total ACh store that is immediately available for release (i.e., the immediately available store, or IAS).
2. A very large store from which ACh cannot be directly released. Part of this fraction is more readily mobilizable than the rest in order to replenish the IAS. The fractional rate of mobilization from this was found to be 1.4 per cent/sec.<sup>31</sup> The rest is the non-readily-releasable fraction, which consists of ACh not already in the form of quanta. This part of the presynaptic store represents a reservoir of transmitter from which quanta can be formed.

The immediately available store (IAS) consists normally of about 300–1,000 quanta,<sup>31</sup> presumably packaged as such. If the immediately available store consists of  $N$  quanta (fig. 12), each with a probability of release ( $p$ ), then the acetylcholine released in response to a nerve action potential will be

$$M = N \times p$$

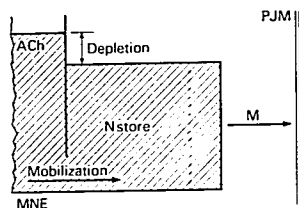

FIG. 12. Diagram depicting the motor nerve ending, showing the presynaptic store of acetylcholine. ACh = acetylcholine, MNE = motor nerve ending,  $M$  = mean quantal content, PJM = postjunctional membrane. Mobilization of acetylcholine occurs from the mobilization store to the immediately available store ( $N$  store). (See text.)

where  $M$  is the mean quantal content of the end-plate potential (epp) or the number of ACh quanta released by a single nerve impulse.  $M$  can be calculated from the amplitude of the epp and the quantum size (mepp). The probability factor ( $p$ ) can be considered to be the proportion of the IAS actually released by a nerve action potential. Thus, the number of quanta released by an impulse is governed by the amount of ACh in the store and the probability of release of each quantum from this store. The effects of calcium, magnesium, and posttetanic potentiation appear to influence mainly the probability of quantal liberation. The amplitude of the epp is approximately proportional to the mean quantal content. The amount of ACh released by a subsequent nerve impulse is dependent on three factors:

- a. transmitter depletion
- b. transmitter mobilization
- c. transmitter facilitation

#### a. Transmitter Depletion

In response to the first nerve action potential (NAP), the release of the mean quantal content ( $M$ ) will reduce the IAS by this amount of ACh released into the synaptic cleft. In the absence of changes in  $p$  or mobilization of ACh from the readily releasable store into the IAS, a second NAP would release a smaller amount of ACh with a subsequent progressive rundown of ACh released by the succeeding NAP's. Figure 13a illustrates this with typical figures



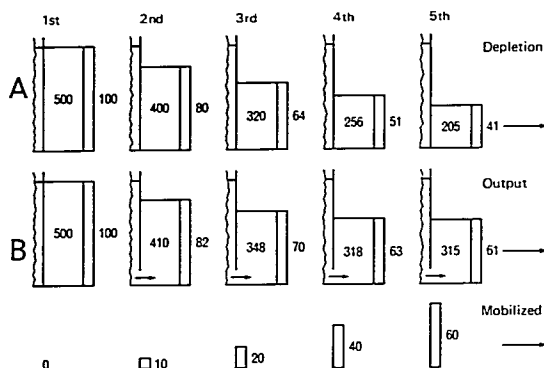

FIG. 13. The decremental release of acetylcholine from the immediately available store in response to repetitive nerve action potentials (numbered at top). Diagrams in series A and B represent acetylcholine stores in the motor nerve ending (see fig. 12). A, an exponential decline of the mean quantal content (number outside boxes) occurs in the absence of changes in probability of release or mobilization. B, Mobilization (arrows) of acetylcholine balances depletion at about the fifth nerve action potential. (Details in text.) Courtesy of Redfern, PA, personal communication.

obtained from the rat phrenic nerve-diaphragm preparation (Redfern and Roberts, personal communication). This depletion is immediate and cumulative.

### b. Transmitter Mobilization

Depletion of the IAS results in the transfer of ACh quanta from the mobilization store to the IAS. This process is time-dependent, and during stimulation at 10 Hz or less, ACh mobilization does not balance ACh release until the fourth or fifth NAP (fig. 13b).

### c. Transmitter Facilitation

Following a single nerve impulse, there is a transient increase in p. Facilitation of the second response occurs at short intervals, but simple facilitation disappears after 300–400 msec. At this time transmitter depletion by the first stimulus is revealed. However, during tetanic stimulation, two opposing processes influence the fractional release of ACh by a single nerve impulse.<sup>35</sup> One is the increased synthesis and mobilization and hence the increase in fractional release of ACh. The extent and duration of this increase are limited by the second process, namely, the progressive depletion of the IAS. The net result is a progressive decline in the mean quantal content (M) or the amplitude of the epp (i.e., the early

tetanic rundown of the epp's). The increased fractional release of ACh is maintained for a time after discontinuation of tetanus and is responsible for the phenomenon of posttetanic facilitation. Thus, the amount of ACh released from the nerve ending in response to a NAP is conditioned by the previous NAP and is determined by the above-mentioned three factors (i.e., transmitter depletion, mobilization and facilitation).

In practice, the epp amplitudes of a train of stimuli at rates between 0.1 Hz and 10 Hz decrease only during the first four or five epp's and change little thereafter.<sup>61,64,96,97</sup> By stimulation of a nerve four times at 2 Hz and repetition of this pattern not more than once every 10 seconds, depletion uncomplicated by facilitation can be revealed (train-of-four stimulation).

The relationship between epp amplitude and the mechanical or electrical twitch response is indirect. Since the response of an individual muscle fiber is all-or-none, epp's greater than threshold will result in normal fiber contraction, whereas a subthreshold epp will cause no contraction.

Attempts to relate the changes in epp amplitude to the resultant changes in the evoked twitch or EMG measurements indicate that the fourth or fifth epp in a short train (or the late epp's in a tetanus) are always smaller

than the first.<sup>24</sup> This is illustrated diagrammatically in figure 14. In the absence of post-junctional block all epp's are above threshold and there is no rundown or fade in the evoked response. Following progressive reduction in postjunctional sensitivity to ACh by a nondepolarizing neuromuscular blocker, the epp amplitudes are reduced but maintain the same relationship, namely, the fourth epp will be smaller than the first in a short train; similarly, the late epp's in a tetanus will be decreased in amplitude with respect to the first. This results in the selective reduction in the fourth twitch response in a train-of-four stimuli and in the late responses in a tetanus. As post-junctional block increases, there is a progressive reduction of all responses, until the epp response to the fourth stimulus becomes sub-

threshold, whereupon the fourth evoked twitch disappears. Finally, all epp's become subthreshold, and there is no detectable response to nerve stimulation, whether it be train-of-four stimulation or tetanic stimulation at various frequencies.

## IX. Pharmacology of Neuromuscular Blockade

The depolarization process at the motor end-plate is presumably initiated by the binding of ACh to the cholinergic receptor at a specialized locus on the end-plate membrane. Details about the cholinergic receptor and its relationship to acetylcholinesterase may be found elsewhere.<sup>81,88-109</sup>

Neuromuscular blocking drugs also bind to

FIG. 14. Diagram of the relation between end-plate potential (epp) amplitude and the size of the evoked twitch response to train-of-four stimulation (2 Hz for 2 seconds). A, in the non-curarized situation, the population of epp amplitudes probably varies in a normal distribution. The two curves represent the normal distribution of epp's of the first and fourth responses. The fourth epp's are shifted to the left or smaller in amplitude than the first epp's. The evoked muscle twitches are equal and maximal in height (right), representing 100 per cent transmission since all epp's are above threshold. B through E, epp amplitudes are reduced progressively by decreased sensitivity to acetylcholine, as in the presence of increasing dosage of a nondepolarizing neuromuscular blocking drug. An increasing number of epp's therefore becomes subthreshold (shaded areas), reducing the number of fibers responding and consequently the evoked twitch height (right). B, reduction of the amplitude of the fourth twitch while the first is not changed because all of the first epp's are above threshold. C and D, reduction of both the first and fourth evoked twitches. E, all epp's developed in response to the fourth stimulus are subthreshold and the fourth twitch is absent. F, all epp's are subthreshold and no twitch is detected. Courtesy of Redfern PA, personal communication.

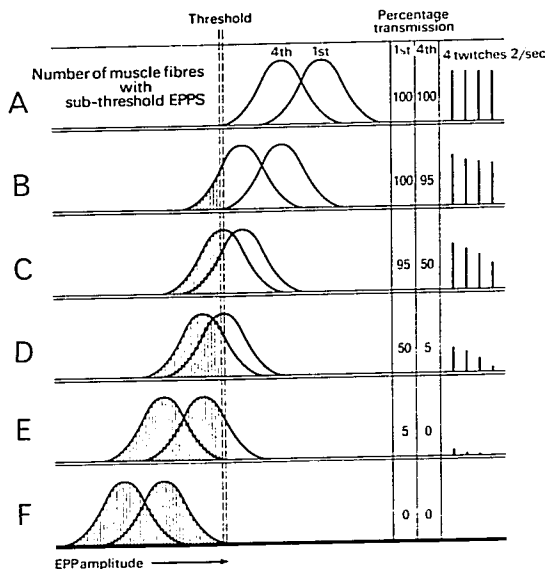

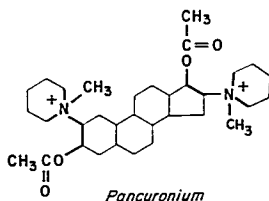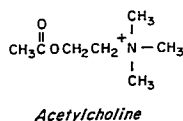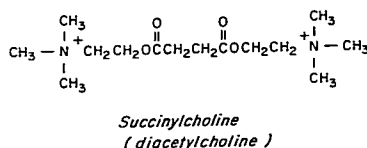

FIG. 15. The structural relationship of acetylcholine to two neuromuscular blocking drugs (from Savarese and Kitz<sup>7</sup>). Succinylcholine (diacetylcholine) is simply two molecules of acetylcholine linked through the acetate methyl groups. Like acetylcholine, it is a flexible molecule whose quaternary nitrogen atoms bear methyl substitutions. Pancuronium may be viewed as two acetylcholine-like fragments (outlined in dark print) properly oriented conformationally on a rigid steroid nucleus. Pancuronium therefore is an inhibitor of acetylcholine, i.e., a nondepolarizing agent.

the cholinergic receptor and in so doing interfere with the physiologic function of ACh. Whether neuromuscular blockers depolarize the end-plate or inhibit its depolarization depends on a variety of factors<sup>7,99,110,111</sup> that relate the structure of the drugs to ACh (fig. 15). Neuromuscular blocking drugs therefore mimic or inhibit the effect of ACh at the motor end-plate. The nondepolarizing blockers prevent depolarization, whereas the depolarizing blockers prevent repolarization, i.e., maintain the

end-plate in a depolarized state, refractory to the action of ACh.<sup>112</sup>

Normal function of the neuromuscular synapse depends ultimately upon the availability and release of adequate quantities of ACh from the motor nerve terminal and on appropriate sensitivity of the motor end-plate to ACh. Although evidence suggests that some neuromuscular blockers inhibit ACh synthesis<sup>112</sup> and release,<sup>111,113</sup> the majority would agree that any such component is not very important in defining their action.<sup>112,114,116</sup> In fact, the quantity of ACh released in the normal situation is far greater than necessary for normal muscular contraction,<sup>32</sup> thereby providing a wide "margin of safety"<sup>32,117-119</sup> of neuromuscular transmission.

#### X. Physiologic and Pharmacologic Factors that May Alter Neuromuscular Function or the Normal Response to Neuro-muscular Blocking Drugs

Knowledge of the interaction between muscle relaxants, drugs, and disease permits dosage adjustment. Anticipation of abnormal circumstances surrounding the use of neuromuscular blockers is an important aspect of the monitoring of neuromuscular function. In some cases, such as in the interaction of relaxants with general anesthetic agents, precise quantification of modifying factors is possible because the subject can be and has been carefully studied. More often, however, clinical information is relatively scant, and is based on isolated case reports or extrapolated from basic scientific studies. In these cases precise evaluation of the effects of neuromuscular blockers in the individual patient requires the use of a nerve stimulator.

##### A. General Anesthetic Agents

The augmentation of the action of nondepolarizing neuromuscular blockers by potent inhalation anesthetics has been recognized for many years, but only recently have the studies of Miller and associates<sup>56,120</sup> quantified the relationship. Such information is particularly valuable in estimating relaxant dosage.

Not only does the potentiation of relaxants vary with equipotent doses of different inhalation agents, but the degree of potentiation

also depends on anesthetic depth (MAC value).<sup>56</sup> The management of relaxation for a given surgical procedure may therefore be satisfactorily achieved with a minimum of inhalation anesthetic and large doses of relaxant or with deep inhalation anesthesia and small doses of neuromuscular blockers, or any technique between these extremes.

General anesthetic vapors produce a parallel shift of the relaxant dose-response curve to the left. The relationship is summarized in figure 16, which shows the action of *d*-tubocurarine during administration of nitrous oxide (balanced anesthesia), § halothane, isoflurane,<sup>56</sup> and enflurane.<sup>120</sup> The volatile anesthetics were given at equipotent dosages (1.25 MAC). Such curves are useful as a guideline to relaxant dosage in the "typical" patient under given anesthetic conditions. Most patients will fall within a relatively narrow range of relaxant requirements,<sup>68</sup> but the number of exceptions is large enough<sup>67</sup> to make a fixed dosage schedule imprudent. It is best to use the guidelines given in figure 16 as the background for an approximate scheme, using the techniques of clinical monitoring suggested elsewhere in this review for "fine tuning."

According to figure 16, approximately 0.3 mg/kg *d*-tubocurarine will produce 95 per cent twitch inhibition during nitrous oxide anesthesia.<sup>68</sup> This degree of block is consistent with good surgical relaxation<sup>67,68</sup> (fig. 10). Twice this dose (0.6 mg/kg) results in the profound relaxation required for smooth intubation of the trachea under similar anesthetic conditions. Halothane (fig. 16) shifts the *d*-tubocurarine dose-response curve leftward from the nitrous oxide curve by a factor of approximately 0.5. In other words, the average patient requires only half as much *d*-tubocurarine with 1.25 MAC halothane as he might with a nitrous oxide-narcotic technique. Isoflurane and enflurane at 1.25 MAC further shift the curve to the left, such that the same patient requires only approximately 30 per cent as much *d*-tubocurarine as he might with nitrous oxide, or about half the require-

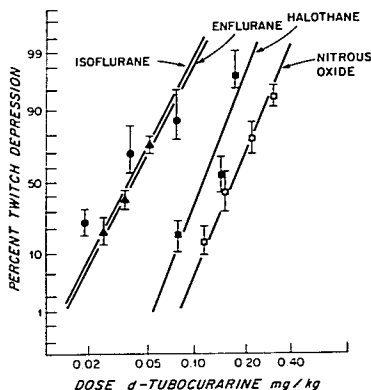

FIG. 16. The interaction of *d*-tubocurarine with 66 per cent nitrous oxide (open squares) and 1.25 MAC halothane (closed squares), isoflurane (circles), and enflurane (triangles). Data from Donlon *et al.*<sup>68</sup> and Miller *et al.*<sup>56,120</sup> Potent volatile anesthetics reduce the nondepolarizing relaxant requirement, i.e., the dose-response curve during nitrous oxide administration is shifted in parallel fashion to the left by a factor of 0.5 for halothane and 0.3 for enflurane and isoflurane (see text).

ment with halothane. A similar relationship exists for pancuronium,<sup>120</sup> and probably for other nondepolarizing drugs.

Desensitization of the motor end-plate at a site beyond the cholinergic receptor is generally accepted as the mechanism of anesthetic potentiation of the effects of nondepolarizing relaxants.<sup>121-123</sup> Other factors such as alteration of muscle blood flow are also important. This is especially true with enflurane<sup>120</sup> and isoflurane,<sup>56,123</sup> and probably explains the potentiation of succinylcholine during enflurane anesthesia,<sup>120</sup> found in the only study in which augmentation of depolarizing block by general anesthetics in the human subject has been documented.

The effect of inhalation anesthetics on the duration of nondepolarizing block has not been quantitated. For example, does a given degree of neuromuscular block achieved during administration of halothane dissipate within the same time span as the same degree of block (achieved at twice the relaxant dose)

§ Savarese JJ, Donlon JV, Ali HH: Human dose-response curves for neuromuscular blocking agents: A comparison of two methods of construction and analysis. Abstracts of Scientific Papers, ASA Annual Meeting, 1974, pp 121-122.

during nitrous oxide anesthesia? We suggest that this may be so, *i.e.*, the general patterns of neuromuscular blockade are the same with different anesthetics, when the relaxant dosages are properly adjusted to produce similar degrees of block in all cases. This concept is suggested in the work of Katz with pancuronium.<sup>72-126</sup> Further documentation is required, however, before this concept may be entirely accepted.

### B. Electrolyte Imbalance

Abnormal electrolyte concentrations may interfere with neuromuscular transmission and alter the typical response to neuromuscular blocking drugs. Although there is ample laboratory confirmation of this effect,<sup>127-131</sup> controlled clinical studies are lacking, and there are few instances where clinically significant changes in neuromuscular function have been documented.<sup>131,132</sup>

The membranes of conducting tissues maintain a negative electrical potential within the cell. The generation of action potentials within nerve and muscle follows the development of increased membrane permeability to sodium and potassium.<sup>127,133</sup> Neuromuscular function thus depends directly on the maintenance of the proper intracellular-to-extracellular ratios of these and other ions.<sup>128,133-138</sup>

Reductions in normal extracellular fluid concentrations of sodium and potassium may prevent the development of adequate current (ionic) flow across nerve and muscle membranes, thus weakening normal neuromuscular function. In such a clinical situation, increased sensitivity to nondepolarizing relaxants theoretically may be anticipated.<sup>127,129,139,140</sup>

An increased extracellular potassium level, on the other hand, partially depolarizes the cell membrane, *i.e.*, reduces the resting membrane potential, and therefore theoretically sensitizes the individual to depolarizing agents, while the actions of nondepolarizing agents are opposed.<sup>129,139</sup>

The size of the motor end-plate potential is governed by the quantity of acetylcholine released from the motor nerve terminal by the action potential.<sup>141</sup> Calcium and magnesium ion concentrations directly affect acetylcholine release, increases in the former promoting, and in the latter inhibiting, transmit-

ter output by the motor nerve terminal.<sup>128-142-144</sup> Decreases in the extracellular contents of these ions have the opposite effects. The proper calcium ion content within skeletal muscle assures normal excitation-contraction coupling.<sup>145</sup>

Since end-plate potential size must reach threshold before the propagation of depolarization to the muscle fiber may occur, it follows that clinical conditions producing hypocalcemia or hypermagnesemia may reduce acetylcholine output, inhibit neuromuscular transmission (table 2) and accentuate the action of neuromuscular blocking drugs.<sup>128,131,143,144</sup>

### C. pH Changes

Although considerable disagreement exists, much has been written concerning the effects of respiratory and metabolic acidosis or alkalosis upon the actions of various relaxants, especially *d*-tubocurarine.<sup>125,130,140,146-156</sup>

Everett *et al.*<sup>157</sup> have shown that the curare molecule is a monoquaternary substance, the second nitrogen atom being a tertiary amine. Kalow<sup>158</sup> has shown that the  $pK_a$  of *d*-tubocurarine is 8.6. This was attributed to the dissociation of the two phenolic hydroxyl groups in the molecule, but in fact the tertiary amine may have been the principal structure titrated. Acidification would favor protonation of the tertiary amine,<sup>159</sup> and shift the equilibrium in favor of the diquaternary form, which has greater potency than the monoquaternary. Reports of antagonism of *d*-tubocurarine block by alkalosis<sup>125,140,150,152</sup> and of "neostigmine-resistant" curarization in acidotic states<sup>154-156</sup> therefore become chemically understandable.

Miller *et al.*<sup>140</sup> have shown that antagonism of *d*-tubocurarine by neostigmine is less effective during metabolic alkalosis and respiratory acidosis. They suggest that these acid-base states may result in hypokalemia and intracellular acidosis, respectively. Both conditions are compatible with potentiation of *d*-tubocurarine and hence decreased effectiveness of its antagonism by neostigmine. Hypokalemia, as indicated in the previous discussion of electrolyte imbalance, may increase the apparent effectiveness of any nondepolarizing neuromuscular blocking drug.<sup>127,129,130,139,140</sup>

The effects of pH changes on the actions

of relaxants other than *d*-tubocurarine are scantily documented. As suggested by several investigators,<sup>116,150,151-153</sup> pH probably plays a less significant and less consistent role in modifying the actions of other nondepolarizing relaxants, unless severe metabolic alkalosis produces hypokalemia.<sup>110</sup>

The determination of serum electrolyte and pH values should be considered in the diagnostic work-up of any neuromuscular disorder or atypical response to neuromuscular blocking drugs.

### D. Hypothermia

There are conflicting reports regarding the effect of hypothermia on the response to neuromuscular blocking drugs. One opinion<sup>159-163</sup> maintains that hypothermia (27°C) decreases the response to *d*-tubocurarine. At 26°C and lower temperatures (*in vitro*) the action of *d*-tubocurarine is potentiated.<sup>159</sup> Recently, Foldes *et al.*<sup>5</sup> have found that decreasing ambient temperature from 37 to 27°C causes statistically significant increases in the intensities of neuromuscular blockades by *d*-tubocurarine, pancuronium, succinylcholine, and decamethonium. Similarly, the intensities of the blocks decreased as the temperature was increased from 27 to 37°C (isolated phrenic nerve-diaphragm preparation). This was confirmed in the intact cat by Miller *et al.*,<sup>165</sup> who attributed the greater intensity of block at low temperatures to the possible retardation of metabolism and renal excretion of the drugs. McKlveen *et al.*<sup>166</sup> were unable to confirm the belief that the antagonism of *d*-tubocurarine-induced neuromuscular blockade with neostigmine during hypothermia may dissipate upon rewarming.

It is evident that the response to relaxants may be altered by changes in temperature. Furthermore, erroneous conclusions may be reached if the evoked responses obtained in a hypothermic peripheral muscle are used to indicate the state of neuromuscular function of the rest of the body.

### E. Hepatic and Renal Disease

With the exception of succinylcholine, all relaxants are excreted almost entirely by the kidney.<sup>166</sup> The hydrophilic nature of the relaxant molecule promotes excretion by glomerular filtration. There is no tubular reabsorption. Consequently, excretion is proportional to the glomerular filtration rate, and will be diminished according to the severity of renal parenchymal dysfunction. This is qualitatively easy to understand, but the only controlled clinical study that provides some quantification of this principle is that of Miller *et al.*<sup>167</sup> with pancuronium. These investigators showed that the duration of pancuronium block in anephric patients was prolonged about 50 per cent. In a similar but not as well-controlled study, Churchill-Davidson, Way and de Jong<sup>168</sup> administered *d*-tubocurarine, 0.4-1.0 mg/kg to six anephric patients. No unusually prolonged response to *d*-tubocurarine was seen, reversal was easily accomplished with neostigmine, and no "regurgitation" occurred. The same investigators, on the other hand, found unsatisfactory reversal and prolonged paralysis in three of five anephric patients who had received gallamine, 2-6 mg/kg. There have been numerous reports of the prolonged effect of gallamine in patients with renal failure.<sup>169-171</sup>

The only neuromuscular blocker other than succinylcholine that is metabolized in the liver is pancuronium; about 15 per cent of an injected dose of this drug undergoes deacetylation and biliary excretion in the human liver.<sup>172</sup> Two other nondepolarizers, *d*-tubocurarine<sup>173</sup> and aletonium,<sup>174</sup> may be excreted unchanged in the bile. This alternative hepatic route for the handling of *d*-tubocurarine and pancuronium is the probable reason why these drugs may be safely employed in anephric patients.<sup>167,168</sup> Ordinary doses, however, may lead to relative overdosage, persistent curarization,<sup>175</sup> and inadequate reversal. In consideration of the above evidence, the dosages of pancuronium and *d*-tubocurarine should be reduced approximately 50 per cent for anephric individuals. Gallamine and dimethyl tubocurarine should not be given to the anephric patient.

The minor role of the liver in the handling of relaxants indicates that severe hepatic dys-

<sup>5</sup> Foldes FF, Koze S, Erdmann KA: The influence of temperature on the activity of neuromuscular blocking agents. Abstracts of Scientific Papers, ASA Annual Meeting, 1974, pp 125-126.

TABLE 1. Disease-Relaxant Interactions

| Disease                                                                                                                               | Type of Relaxant Interaction and Clinical Implication                                                                                                                                                                                                                                                                                                                                                               |
|---------------------------------------------------------------------------------------------------------------------------------------|---------------------------------------------------------------------------------------------------------------------------------------------------------------------------------------------------------------------------------------------------------------------------------------------------------------------------------------------------------------------------------------------------------------------|
| Myasthenia gravis                                                                                                                     | 1) Resistance to depolarizing drugs. Rapid development of phase II block. (This is the basis for using decamethonium as a test for myasthenia. <sup>195, 196</sup> )<br>2) Extreme sensitivity to nondepolarizers ( <i>d</i> -tubocurarine test). The weakness responds to anticholinesterases. <sup>195-197</sup>                                                                                                  |
| Myasthenic syndrome (Eaton-Lambert syndrome)                                                                                          | 1) Marked sensitivity to nondepolarizing relaxants. The block is not readily reversed with neostigmine. <sup>198</sup> In contrast to myasthenia gravis, the response to fast rates of stimulation is a progressive <i>increase</i> in twitch amplitude to as much as six times the initial height. <sup>199</sup><br>2) Relative sensitivity to an average clinical dose of depolarizing relaxants. <sup>200</sup> |
| Thyrotoxic myopathy                                                                                                                   | 1) Decreased response to succinylcholine (pseudocholinesterase levels are at the upper limit of normal). There is an increase in the level of pseudocholinesterase in hyperthyroidism. <sup>201</sup><br>2) Increased sensitivity to decamethonium. <sup>202, 203</sup><br>3) Normal <i>d</i> -tubocurarine requirement.                                                                                            |
| Amiotrophic lateral sclerosis and other diseases in which the lower motor neuron is involved, such as syringomyelia and poliomyelitis | 1) Defective neuromuscular transmission and nerve conduction. <sup>204, 205</sup><br>2) Exaggerated response to nondepolarizers. <sup>204, 206</sup>                                                                                                                                                                                                                                                                |
| Von Recklinghausen's disease (multiple neurofibromatosis)                                                                             | The response is variable. Some subjects show prolonged responses to both nondepolarizing and depolarizing relaxants. <sup>207, 208</sup> Others, like myasthenics, are sensitive to <i>d</i> -tubocurarine and resistant to succinylcholine. <sup>209</sup>                                                                                                                                                         |
| Myotonic syndrome:<br>a) Myotonia dystrophica<br>b) Myotonia congenita<br>c) Paramyotonia                                             | Generalized muscle spasm (myotonic response) occurs after depolarizing agents. <sup>210-212</sup> <i>d</i> -Tubocurarine does not terminate the myotonic state. <sup>210</sup> Myotonia is alleviated by quinine and procainamide. <sup>210, 217</sup>                                                                                                                                                              |
| Other genetically determined myopathies:<br>Muscular dystrophy<br>Obscure congenital myopathies<br>Familial periodic paralysis        | The response to relaxants is unpredictable, and their use is better avoided. <sup>218</sup>                                                                                                                                                                                                                                                                                                                         |
| Other types of myopathy:<br>Steroid<br>Myxedema<br>Alcoholic<br>Diabetic                                                              | Unpredictable response to relaxants.                                                                                                                                                                                                                                                                                                                                                                                |
| Polymyositis<br>Dermatomyositis<br>Systemic lupus erythematosus<br>Polyarteritis nodosa                                               | The muscle weakness and fatigability respond to neostigmine, hence the term "myasthenic state." <sup>219, 219</sup>                                                                                                                                                                                                                                                                                                 |
| Hypokalemia, e.g., from excessive loss of potassium from bowel or kidney. <sup>220, 221</sup>                                         | Theoretically increased sensitivity to nondepolarizing relaxants.                                                                                                                                                                                                                                                                                                                                                   |

TABLE 1. (Continued)

| Disease                                                                                                                                                                                                                                                                                                                                                                                                                                                                                                                                                                                         | Type of Relevant Interaction and Clinical Implication                                                                                                                                                                                                                                                                                                                                                                               |
|-------------------------------------------------------------------------------------------------------------------------------------------------------------------------------------------------------------------------------------------------------------------------------------------------------------------------------------------------------------------------------------------------------------------------------------------------------------------------------------------------------------------------------------------------------------------------------------------------|-------------------------------------------------------------------------------------------------------------------------------------------------------------------------------------------------------------------------------------------------------------------------------------------------------------------------------------------------------------------------------------------------------------------------------------|
| Hyperkalemia, e.g., from an efflux of intracellular potassium with rapid increase in serum potassium in disorders of muscles that are subjected to depolarizing drugs. This can occur in the following disease states:<br>1) Traumatized patients <sup>222-224</sup><br>2) Burned patients <sup>225</sup><br>3) Muscle-wasting disease<br>Lower-motor-neuron lesions with hemiplegia <sup>226</sup><br>Muscular dystrophy <sup>227</sup><br>Denervation and spinal-cord transection <sup>228</sup><br>Multiple sclerosis <sup>229</sup><br>Tetanus <sup>230</sup><br>Denervation <sup>231</sup> | The dangerous effect of hyperkalemia on the heart is well recognized. <sup>222-231</sup> Ventricular arrhythmias, ventricular fibrillation and cardiac arrest have been reported. <sup>224,225,227,230</sup> Theoretically increased sensitivity to depolarizing relaxants and decreased sensitivity to nondepolarizing relaxants.<br><br>No significant rise of serum potassium within a few hours of gross trauma. <sup>223</sup> |
| Primary muscle disease or myopathy                                                                                                                                                                                                                                                                                                                                                                                                                                                                                                                                                              | High incidence of malignant hyperpyrexia in these patients and susceptible relatives. Usually the myopathy is mild or subclinical. Squints, hernias and minor orthopedic problems are often found in affected families. <sup>232,233</sup> It has been shown that malignant hyperpyrexia muscle is more sensitive to caffeine-induced rigor than normal muscle. <sup>234-236</sup>                                                  |

function alone does not necessitate any important modification of their use, except in the case of succinylcholine (see section on plasma cholinesterase). Dundee and Gray,<sup>176</sup> however, have reported resistance to *d*-tubocurarine in the presence of hepatic disease. Reversed albumin/globulin ratios in these patients, causing increased binding of *d*-tubocurarine to plasma globulins,<sup>177</sup> may be the reason for this finding.

The safe use of relaxants in management of patients who have hepatic and renal disease therefore depends, first, upon a knowledge of the modification of the actions of these drugs by these disorders, and second, more importantly, upon the proper evaluation of their effects in the individual patient by the use of a nerve stimulator. This type of monitoring is mandatory when relaxants are to be used in anephric patients.

#### F. Enzymatic Abnormalities

##### A. Plasma Cholinesterase

The short duration of action of succinylcholine is due to the hydrolysis of the drug

by this enzyme,<sup>178</sup> which is synthesized in the liver. There is wide variation in the time-responses to succinylcholine in normal patients<sup>179</sup> due to considerable differences in plasma cholinesterase activity.<sup>180</sup>

A prolonged response to succinylcholine may be expected in individuals whose plasma cholinesterase activity is abnormally low due to congenital factors, e.g., atypical enzyme, or acquired factors, e.g., hepatic disease and drugs that inhibit the enzyme. For reviews, see Pantuck and Pantuck,<sup>180</sup> Pantuck,<sup>181</sup> Whitaker and Vickers,<sup>182</sup> and Kalow.<sup>183</sup> A list of compounds that inhibit plasma cholinesterase is included in table 2.

Unfortunately, a prolonged response to succinylcholine usually occurs unexpectedly. The extended period of paralysis requiring mechanical ventilation for one to several hours places the patient in an uncomfortable and dangerous position. This may be an embarrassing and inconvenient task for the anesthesiologist. Although determination of the dibucaine number and plasma cholinesterase activity of every patient who is to receive



TABLE 2. Drug-Relaxant Interactions

| Drug                                                                                                                                                              | Mechanism of Interaction                                                                                                                        | Clinical Implication                                                                                                                                                           |
|-------------------------------------------------------------------------------------------------------------------------------------------------------------------|-------------------------------------------------------------------------------------------------------------------------------------------------|--------------------------------------------------------------------------------------------------------------------------------------------------------------------------------|
| Magnesium                                                                                                                                                         | Blocks the release of acetylcholine at the neuromuscular junction as well as accelerates the action of true cholinesterase. <sup>128, 144</sup> | Potentiates the action of all relaxants when used in large amounts (e.g., eclampsia). <sup>121</sup> This effect is reversed by calcium ions. <sup>144</sup>                   |
| Lithium                                                                                                                                                           | Increases transmitter release. <sup>237, 238</sup>                                                                                              | Prolongs succinylcholine block.*<br>Prolongs pancuronium block. <sup>239</sup>                                                                                                 |
| Procaine and other local anesthetics                                                                                                                              | Inhibit the release of acetylcholine. <sup>240, 241</sup>                                                                                       | Potentialize nondepolarizing drugs and prolong the action of succinylcholine.                                                                                                  |
| Pitocin (Syntocinon)                                                                                                                                              | Prolonged infusion alters the sensitivity of the endplate to depolarization by succinylcholine. <sup>242</sup>                                  | The duration of action of succinylcholine is prolonged and increased dosage may be needed. <sup>242</sup> This has not been confirmed. <sup>243, 245</sup>                     |
| Ganglion-blocking drugs<br>Pentamethonium<br>Hexamethonium<br>Trimethaphan (Arfonad)                                                                              | Compete with acetylcholine at the neuromuscular junction.                                                                                       | Potentialize nondepolarizers and antagonize depolarizers. <sup>246</sup> Trimethaphan may potentialize succinylcholine. <sup>247, 248</sup>                                    |
| Quinidine                                                                                                                                                         | May diminish endplate sensitivity to transmitter.                                                                                               | Recurarization after dimethyl tubocurarine. <sup>249</sup> May prolong the action of succinylcholine. <sup>250, 251</sup> Potentializes nondepolarizing agents. <sup>252</sup> |
| Cytotoxic drugs (alkylating agents)<br>Nitrogen mustard and related drugs, e.g., mechlorethamine<br>Cyclophosphamide<br>Triethylmelamine<br>Chlorambucil<br>AB132 | Inhibition of plasma cholinesterase by alkylating the enzyme.                                                                                   | Prolong succinylcholine action. <sup>253, 254</sup>                                                                                                                            |
| Echthiophate (eye drops)                                                                                                                                          | A long-acting anticholinesterase. Inhibits plasma cholinesterase.                                                                               | Prolonged response to succinylcholine. <sup>255, 256</sup>                                                                                                                     |
| Tetrahydroaminoacrine (Tacrine)<br>Hexafluorenum (Mylaxen)                                                                                                        | Inhibition of plasma cholinesterase.                                                                                                            | Prolonged succinylcholine action. <sup>257, 258</sup>                                                                                                                          |
| Antibiotics (streptomycin, Neomycin, polymyxin, Colimycin, kanamycin)                                                                                             | Reduce acetylcholine output by competing with calcium at presynaptic membrane binding sites (a "magnesium-like effect").                        | Increased sensitivity to curare-like drugs. <sup>259</sup>                                                                                                                     |
| Diuretics (acetazolamide, chlorothiazide, furosemide, ethacrynic acid)                                                                                            | Potassium loss.                                                                                                                                 | Hypokalemia may theoretically potentialize nondepolarizing block. <sup>129</sup>                                                                                               |

\* Hill GE, Wong HC, Hodges MR: Potentiation of succinylcholine neuromuscular blockade by lithium carbonate. *ANESTHESIOLOGY* 44:439-442, 1976.

succinylcholine has been advocated,<sup>184</sup> this task is too expensive for practical purposes. The anesthesiologist is nevertheless faced with the problem of anticipating which individual may develop an inappropriately prolonged response to an ordinary (0.5–1.0 mg/kg) dose of succinylcholine. History and physical examination provide the first indication (hepatic disease preventing synthesis of plasma cholinesterase, concomitant reception of drugs [see table 2] that may inhibit the enzyme, or family or personal history of prolonged mechanical ventilation after surgery).

The second clue may be found in a simple clinical test.<sup>185,186</sup> A dose of 0.05–0.1 mg/kg succinylcholine may be given to the already-anesthetized spontaneously breathing patient in whom a prolonged response to succinylcholine is suspected on the basis of history, or for that matter, to any patient in whom such a problem is to be avoided, such as the outpatient undergoing minor surgery. Apnea does not occur in normal patients after such doses, and respiratory depression, if any, dissipates within 2–3 minutes. The occurrence of profound paralysis or apnea lasting more than 5 minutes in this situation suggests the presence of one of the above-mentioned congenital or acquired disorders of plasma cholinesterase.<sup>187,188</sup> Further immediate diagnostic aid is achieved by the use of a nerve stimulator. The above-described test should virtually abolish the evoked twitch in a patient who has a plasma cholinesterase abnormality, but not in a normal individual. The diagnosis may later be confirmed by the dibucaine test<sup>189</sup> or another measurement of plasma cholinesterase activity and genotype.

#### *B. Creatine Phosphokinase (CPK), Aldolase, Lactic Dehydrogenase (LDH)*

Predisposition to the development of malignant hyperthermia is familial, the abnormality being inherited as a mendelian autosomal dominant trait.<sup>190</sup> *A priori* identification of individuals potentially susceptible to this disastrous complication is mandatory, since this syndrome is fatal in an estimated 66 per cent of affected patients.<sup>191</sup>

Elevated serum concentrations of several skeletal-muscle enzymes have been found in families and individuals carrying the malignant hyperthermic trait. These include creatine phosphokinase (CPK), aldolase, serum glutamic-oxaloacetic transaminase (SGOT), hydroxybutyric dehydrogenase (HBDH), and lactic dehydrogenase (LDH).<sup>192</sup> The most important for identification of individuals potentially susceptible to the hyperthermic syndrome is CPK,<sup>192,193</sup> since nearly all of this enzyme is found in skeletal muscle, whereas the others listed above may be obtained from other organs, such as liver, lungs, kidney, and brain.<sup>192</sup>

CPK determination is therefore an important aspect in the total evaluation of neuromuscular function relative to anesthesia. The discovery of a high serum CPK in a patient showing a positive family history of malignant hyperthermia, muscle or musculoskeletal disease, or unexplained death under anesthesia should prompt the adoption of a variety of potentially life-saving precautions if the patient is to undergo anesthesia.<sup>192</sup>

#### *G. Neuromuscular Diseases*

Diseases affecting the neuromuscular system are not uncommon. In addition, muscle weakness is a feature of many illnesses. Possible interactions of some of these disease states with neuromuscular blocking drugs are summarized in table 1. The necessity of monitoring neuromuscular function under these circumstances, where the customary use of and response to relaxants cannot be anticipated, is obvious.

#### *H. Drug Interactions*

Many drugs modify the action of muscle relaxants. Such substances may interfere directly with neuromuscular transmission or they may influence the action of relaxants by extrajunctional mechanisms. A brief description of these drugs is presented in table 2. Knowledge of these interactions and the monitoring of neuromuscular function during anesthesia may prevent the occurrence of clinical complications.

## XI. Conclusion

Detailed assessment of neuromuscular function must begin preoperatively, extend throughout the conduct of anesthesia, and end postoperatively when the anesthesiologist elicits a satisfactory demonstration of adequate muscular strength from the patient. The anesthesiologist must consider the prior medical history of the patient, including family history and genetic background, the dosage and duration of action of any drugs he may be taking, and their possible interaction with neuromuscular blocking drugs; the presence of neurologic deficits on physical examination; the fluid and electrolyte status; serum enzyme values; and both hepatic and renal function. These considerations only serve to modify the choice and dosage of neuromuscular blocker. The anesthesiologist must, in addition, be familiar with the use of clinical techniques of monitoring of neuromuscular function, as a guide to relaxant dosage and to confirm the adequacy of postoperative recovery.

## References

- Katz RL: Monitoring of muscle relaxation and neuromuscular transmission. Patient Monitoring. Edited by JF Crul, JP Payne. Amsterdam, Excerpta Medica, 1970, chapter V
- Katz RL: Comparison of electrical and mechanical recording of spontaneous and evoked muscle activity. *ANESTHESIOLOGY* 26:204-211, 1965
- Churchill-Davidson HC, Katz RL: Dual, phase II, or desensitization block? *ANESTHESIOLOGY* 27:536-538, 1966
- Churchill-Davidson HC, Christie TH: Diagnosis of neuromuscular block in man. *Br J Anaesth* 31: 290-295, 1959
- Christie TH, Churchill-Davidson HC: St. Thomas' Hospital nerve stimulator in diagnosis of prolonged apnea. *Lancet* 1:776-778, 1958
- Katz RL: What's new and old but true in relaxants. ASA Refresher Courses in Anesthesiology. Volume II. Philadelphia, Lippincott, 1974
- Savarese JJ, Kitz RJ: Some aspects of the basic and clinical pharmacology of neuromuscular blocking drugs. ASA Refresher Courses in Anesthesiology. Volume III. Philadelphia, Lippincott, 1975
- Epstein RA, Epstein RM: The electromyogram and the mechanical response of indirectly stimulated muscle in anesthetized man following curarization. *ANESTHESIOLOGY* 38: 212-223, 1973
- Katz RL: Electromyographic and mechanical effects of suxamethonium and tubocurarine on twitch, tetanic and posttetanic responses. *Br J Anaesth* 45:849-859, 1973
- Churchill-Davidson HC, Christie TH, Wise RP: Dual neuromuscular block in man. *ANESTHESIOLOGY* 21:144-149, 1960
- Crul JF, Long GI, Brunner EA, et al: The changing pattern of neuromuscular blockade caused by succinylcholine in man. *ANESTHESIOLOGY* 27:729-735, 1966
- Lee C: Dose relationships of phase II, tachyphylaxis and train-of-four fade in suxamethonium-induced dual neuromuscular block in man. *Br J Anaesth* 47:841-845, 1975
- Heisterkamp DV, Skovsted P, Cohen PJ: The effects of small incremental doses of *d*-tubocurarine on neuromuscular transmission in anesthetized man. *ANESTHESIOLOGY* 30: 500-505, 1969
- deJong RH, Freund FG: Characteristics of the neuromuscular block with succinylcholine and decamethonium in man. *ANESTHESIOLOGY* 28:583-591, 1967
- Savarese JJ, Ali HH, Murphy JD, et al: Train-of-four nerve stimulation in the management of prolonged neuromuscular blockade following succinylcholine. *ANESTHESIOLOGY* 42: 106-111, 1975
- Katz RL, Wolf CE, Papper EM: The nondepolarizing neuromuscular blocking action of succinylcholine in man. *ANESTHESIOLOGY* 24:784-789, 1963
- Mushin WW, Wien R, Mason DFJ, et al: Curare-like actions of tri-(diethylaminoethoxy)-benzene triethyliodide. *Lancet* 1: 726-728, 1949
- Unna KR, Pelikan EW: Evaluation of curarizing drugs in man. VI. Critique of experiments on unanesthetized subjects. *Ann NY Acad Sci* 54:480-490, 1951
- Bodman RI: Some observations on assaying of muscle relaxants in conscious volunteers. *Anesth Analg (Paris)* 9:5-13, 1952
- Foldes FF, Monte AP, Brunn HM, et al: Studies with muscle relaxants in unanesthetized subjects. *ANESTHESIOLOGY* 22:230-235, 1961
- Organe G, Paton WDM, Zaimis, EJ: Preliminary trials of bistrimethylammonium decane and pentane diiodide (C10 and C5) in man. *Lancet* 1:21-23, 1949
- Unna KR, Pelikan EW, Macfarlane WD, et al: Evaluation of curarizing drugs in man. I. Potency, duration of action and effects on vital capacity of *d*-tubocurarine, dimethyl tubocurarine and decamethylene bis tri-methylammonium bromide. *J Pharmacol Exp Ther* 98:318-329, 1950
- Bendixen HH, Surtees AD, Oyama T, et al: Postoperative disturbances in ventilation fol-

- lowing the use of muscle relaxants in anesthesia. *ANESTHESIOLOGY* 20:121-122, 1959
24. Dam WH, Goldmann N: Inadequate post-anesthetic ventilation. *ANESTHESIOLOGY* 22: 699-707, 1961
25. Johansen SH, Jorgensen M, Molbech S: Effect of tubocurarine on respiratory and nonrespiratory muscle power in man. *J Appl Physiol* 19:990-994, 1964
26. Harvey AH, Masland RL: A method for study of neuromuscular transmission in humans. *Johns Hopkins Hosp Bull* 68:81-93, 1941
27. Baraka A: The influence of carbon dioxide on the neuromuscular block caused by tubocurarine chloride in the human subject. *Br J Anaesth* 36:272-278, 1964
28. Theis-Jeff S: An investigation of the muscle relaxing action of succinylcholine iodide in man. *Acta Physiol Scand* 25:348-367, 1952
29. Bigland B, Lippold OJC: Motor unit activity in voluntary contraction of human muscles. *J Physiol (Lond)* 125:322-335, 1954
30. Walts LF, Lebowitz M, Dillon JB: A means of recording force of thumb adduction. *ANESTHESIOLOGY* 29:1054-1055, 1968
31. Ali HH: A new device for monitoring force of thumb adduction. *Br J Anaesth* 42:83-85, 1970
32. Mapleson WW, Mushin WW: Relaxant action in man: An experimental study. *Anaesthesia* 10:265-278, 1955
33. Epstein RA, Wyte SR, Jackson SH, et al: The electromechanical response to stimulation by the Block-Aid monitor. *ANESTHESIOLOGY* 30: 43-47, 1969
34. Merton PA: Voluntary strength and fatigue. *J Physiol (Lond)* 123:553-564, 1954
35. Freund FG, Merati JK: A source of errors in assessing neuromuscular blockade. *ANESTHESIOLOGY* 39:540-542, 1973
36. Ali HH, Utting JE, Gray TC: Quantitative assessment of residual antipolarizing block (Part II). *Br J Anaesth* 43:478-485, 1971
37. Roberts DV, Wilson A: Electromyography in diagnosis and treatment. *Myasthenia Gravis*. Edited by R. Green. London, William Heinemann Medical Books Limited, 1969, pp 29-42
38. Grob D, Johns RJ, Harvey AM: Studies in neuromuscular function. I. Introduction and methods. *Johns Hopkins Hosp Bull* 99:115-124, 1956
39. Gissen AJ: Standardized technique for transmission studies (letter). *ANESTHESIOLOGY* 39:567-568, 1973
40. Epstein RM, Epstein RA, Lee ASJ: A recording system for continuous evoked electromyography. *ANESTHESIOLOGY* 38:287-289, 1973
41. Epstein RM, Epstein RA: Electromyography in evaluation of the response to muscle relaxants. *Muscle Relaxants*. Edited by RL Katz. New York, American Elsevier Publishing Co., 1975, pp 299-312
42. Chou TC: A method of estimating curare-like activity on isolated phrenic nerve diaphragm preparation in the rat. *Br J Pharmacol* 2:1-7, 1947
43. Cuyton AC, Reeder RC: The dynamics of curarization. *J Pharmacol Exp Ther* 97:322-330, 1949
44. Preston JB, Van Maanen EF: Effects of frequency of stimulation on the paralyzing dose of neuromuscular blocking agents. *J Pharmacol Exp Ther* 107:165-171, 1953
45. Wislicki L: Effects of rate of stimulation and of fatigue on the response to neuromuscular blocking agents. *Br J Pharmacol* 13:138-143, 1958
46. Blackman JC: Stimulus frequency and neuromuscular block. *Br J Pharmacol* 20:5-16, 1963
47. Ali HH, Utting JE, Gray TC: Stimulus frequency in the detection of neuromuscular block in humans. *Br J Anaesth* 42:967-978, 1970
48. Rosenbluth A, Wills JH, Hoagland H: The slow components of the electromyogram of striated muscle. *Am J Physiol* 133:724-735, 1941
49. Looftbourrow GN: Electromyographic evaluation of mechanical responses in mammalian skeletal muscle in different conditions. *J Neurophysiol* 11:153-167, 1948
50. Lippold OJC: The relation between integrated action potentials in a human muscle and its isometric tension. *J Physiol (Lond)* 117:492-499, 1952
51. Inman VT, Ralston HJ, Saunderson CM, et al: Relation of human electromyogram to muscle tension. *Electroenceph Clin Neurophysiol* 4:187-194, 1952
52. Botelho SY: Comparison of simultaneously recorded electrical and mechanical activity in myasthenia gravis patients and in partially curarized normal humans. *Am J Med* 19: 693-696, 1955
53. Paton WDM, Wand DR: The margin of safety of neuromuscular transmission. *J Physiol (Lond)* 191:59-90, 1967
54. Gissen AJ, Katz RL: Twitch, tetanus and posttetanic potentiation as indices of nerve-muscle block in man. *ANESTHESIOLOGY* 30: 481-487, 1969
55. Cohen PJ, Heisterkamp CV, Skovsted P: The effect of general anesthesia on the response to tetanic stimulus in man. *Br J Anaesth* 42:543-547, 1970
56. Miller RD, Eger EI II, Way WL, et al: Comparative neuromuscular effects of Forane and halothane alone and in combination with *d*-tubocurarine in man. *ANESTHESIOLOGY* 35:38-42, 1971
57. Von Euler VS, Brown GL: The after effects of tetanus in mammalian muscle. *J Physiol (Lond)* 93:39-60, 1938
58. Botelho SY, Cander L: Post-tetanic potentiation before and during ischemia in intact human skeletal muscle. *J Appl Physiol* 6: 221-228, 1953
59. Standaert FG: Post-tetanic repetitive activity

- in the cat soleus nerve. *J Gen Physiol* 47:53-70, 1963
60. Werner G: The presynaptic action of *d*-tubocurarine and Flaxedil at the neuromuscular junction. *Fed Proc* 18:458, 1959
  61. Liley AW, North KAK: An electrical investigation of the effects of repetitive stimulation on mammalian neuromuscular junction. *J Neurophysiol* 16:509-527, 1953
  62. Ali HH, Utting JE, Gray TC: Quantitative assessment of residual antidepolarizing block (Part I). *Br J Anaesth* 43:473-477, 1971
  63. Ali HH, Kitz RJ: Evaluation of recovery from nondepolarizing neuromuscular block using a digital neuromuscular transmission analyzer—preliminary report. *Anesth Analg (Cleve)* 52:740-745, 1973
  64. Ali HH, Wilson RS, Savarese JJ, et al: The effect of tubocurarine on indirectly elicited train-of-four muscle response and respiratory measurements in humans. *Br J Anaesth* 47: 570-574, 1975
  65. Goudsouzian NG, Donlon JV, Savarese JJ, et al: Re-evaluation of dosage and duration of action of *d*-tubocurarine in the pediatric age group. *ANESTHESIOLOGY* 43:416-425, 1975
  66. Lee C: Train-of-4 quantitation of competitive neuromuscular block. *Anesth Analg (Cleve)* 54:649-653, 1975
  67. Katz RL: Neuromuscular effects of *d*-tubocurarine, edrophonium and neostigmine in man. *ANESTHESIOLOGY* 28:327-336, 1967
  68. Donlon JV, Ali HH, Savarese JJ: A new approach to the study of four nondepolarizing relaxants in man. *Anesth Analg (Cleve)* 53:934-939, 1974
  69. deJong RH: Controlled relaxation. I. Quantitation of EMG with abdominal relaxation. *JAMA* 197:393-399, 1966
  70. deJong RH: Controlled relaxation. II. Clinical management of muscle relaxant administration. *JAMA* 198:1163-1166, 1966
  71. Usabiaga JE, Moya F: The clinical use of a new nerve stimulator. *Acta Anaesthesiol Scand* 11: 15-24, 1967
  72. Fink BR: A method of monitoring muscular relaxation by the integrated abdominal electromyogram. *ANESTHESIOLOGY* 21: 178-185, 1960
  73. Katz RL, Wolf CE: Neuromuscular and electromyographic studies in man: Effects of hyperventilation, carbon dioxide inhalation and *d*-tubocurarine. *ANESTHESIOLOGY* 25: 781-787, 1964
  74. Katz RL, Katz GJ: Clinical considerations in the use of muscle relaxants. *Muscle Relaxants*. Edited by RL Katz. New York, American Elsevier Publishing Co., 1975, pp 313-315
  75. Katz RL: Clinical neuromuscular pharmacology of pancuronium. *ANESTHESIOLOGY* 34: 550-555, 1971
  76. Pontoppidan H, Geffin B, Lowenstein E: *Acute Respiratory Failure in the Adult*. Boston, Little, Brown and Company, 1973, p 60.
  77. Walts LF, Levin N, Dillon JB: Assessment of recovery from curare. *JAMA* 213:1894-1896, 1970
  78. Couteaux R: Localization of cholinesterase at neuromuscular junctions. *Int Rev Cytol* 4: 335-375, 1955
  79. DeRobertis EDP: Submicroscopic morphology of the synapse. *Int Rev Cytol* 8:61-96, 1959
  80. Tiesgs OW: Innervation of voluntary muscle. *Physiol Rev* 33:90-144, 1953
  81. Zacks SI: *The Motor End Plate*. Philadelphia, W. B. Saunders, 1964
  82. Blaber LC, Karczmar AG: Multiple cholinceptive sites at the neuromuscular junction. *Ann NY Acad Sci* 54:407-437, 1967
  83. Hubbard JI: Mechanism of transmitter release. *Progr Biophys Mol Biol* 21:35-124, 1970
  84. Nachmansohn D, Machado AL: Formation of acetylcholine. New enzyme: "choline acetylase." *J Neurophysiol* 6:397-403, 1943
  85. Birks RJ, McIntosh FC: Acetylcholine metabolism of a sympathetic ganglion. *Can J Biochem Physiol* 39:787-827, 1961
  86. Liley AW: The quantal components of the mammalian endplate potential. *J Physiol (Lond)* 133:571-587, 1956
  87. Fatt P, Katz B: Spontaneous subthreshold activity at motor nerve endings. *J Physiol (Lond)* 117:109-128, 1952
  88. Katz B: Quantal mechanism of neural transmitter release. *Science* 173:123-126, 1971
  89. Miledi R: From nerve to muscle. *Discovery* 22: 442-450, 1961
  90. Katz B, Miledi R: Tetrodotoxin-resistant electrical activity in presynaptic terminals. *J Physiol (Lond)* 203:459-487, 1969
  91. Katz B, Miledi R: Spontaneous and evoked activity of motor nerve endings in calcium ringer. *J Physiol (Lond)* 203:689-706, 1969
  92. Katz B, Miledi R: Further study of the role of calcium in synaptic transmission. *J Physiol (Lond)* 207:789-801, 1970
  93. Katz B, Miledi R: A study of synaptic transmission in the absence of nerve impulses. *J Physiol (Lond)* 192:407-436, 1967
  94. Elmqvist D, Quastel DMJ: A quantitative study of end-plate potentials in isolated human muscle. *J Physiol (Lond)* 178:505-529, 1965
  95. Thesleff S: The mode of neuromuscular block caused by acetylcholine, nicotine, decamethonium and succinylcholine. *Acta Physiol Scand* 34:218-231, 1955
  96. Boyd JA, Martin AR: The end-plate potential in mammalian muscle. *J Physiol (Lond)* 132:74-91, 1956
  97. Brooks VB, Thies RD: Reduction of quantum content during neuromuscular transmission. *J Physiol (Lond)* 162:298-310, 1962
  98. Watkins JC: Pharmacological receptors and general permeability phenomena of all membranes. *J Theor Biol* 9:37-50, 1965
  99. Martin-Smith M: Rational elements in the development of superior neuromuscular block-

- ing agents. Drug Design, Volume II. Edited by EJ Ariens. New York, Academic Press, 1971, Chapter 12
100. Waser PG: The cholinergic receptor. *J Pharm Pharmacol* 12:577-594, 1960
101. Ehrenpreis S: Possible nature of cholinergic receptors. *Ann NY Acad Sci* 144:720-736, 1967
102. Miledi R, Molinoff P, Potter LT: Isolation of the cholinergic receptor protein of *torpedo* electric tissue. *Nature* 229:554-557, 1971
103. DeRobertis R: Ultrastructure and cytochemistry of the synaptic region. *Science* 156:907-914, 1967
104. Zupancic AO: Evidence for the identity of anionic centers of cholinesterases with cholinergic receptors. *Ann NY Acad Sci* 144:689-693, 1967
105. Ehrenpreis S, Fleisch JH, Mittag TW: Approaches to the molecular nature of pharmacologic receptors. *Pharmacol Rev* 21:131-181, 1969
106. Cavallito CJ: Some relationships between chemical structure and pharmacological activities. *Annu Rev Pharmacol* 8:39-66, 1968
107. Cavallito CJ: Bonding characteristics of acetylcholine simulants and antagonists and cholinergic receptors. *Ann NY Acad Sci* 144:900-912, 1967
108. Belleau B: Water as the determinant of thermodynamic transitions in the interaction of aliphatic chains with acetylcholinesterase and the cholinergic receptors. *Ann NY Acad Sci* 144:705-719, 1967
109. Wurzel M: Physiological role of cholinesterase at cholinergic receptor sites. *Ann NY Acad Sci* 144:694-704, 1967
110. Bovet D: Some aspects of the relationship between chemical constitution and curare-like activity. *Ann NY Acad Sci* 54:407-432, 1951
111. Carrier O Jr: Curare and curareform drugs. *Medicinal Chemistry*. Edited by A Burger. New York, Wiley-Interscience, 1970, Chapter 61
112. Waud DR: The nature of "depolarization block." *ANESTHESIOLOGY* 29:1014-1024, 1968
113. MacIntosh FC: Effect of HC-3 on acetylcholine turnover. *Fed Proc* 20:562-568, 1961
114. Hubbard JI, Wilson DF, Miyamoto M: Reduction of transmitter release by *d*-tubocurarine. *Nature* 223:531-533, 1969
115. Galindo A: Prejunctional effect of curare: Its relative importance. *J Neurophysiol* 34:289-301, 1971
116. Auerbach A, Betz W: Does curare affect transmitter release? *J Physiol (Lond)* 213:691-705, 1971
117. Waud BE, Waud DR: The relation between tetanic fade and receptor occlusion in the presence of competitive neuromuscular block. *ANESTHESIOLOGY* 35:456-464, 1971
118. Waud BE, Waud DR: The relation between the response to "train of four" stimulation and receptor occlusion during competitive neuromuscular block. *ANESTHESIOLOGY* 37:413-416, 1972
119. Waud BE, Waud DR: The margin of safety of neuromuscular transmission in the muscle of the diaphragm. *ANESTHESIOLOGY* 37:417-422, 1972
120. Fogdall, RP, Miller RD: Neuromuscular effects of enflurane, alone and in combination with *d*-tubocurarine, pancuronium, and succinylcholine in man. *ANESTHESIOLOGY* 42:173-178, 1975
121. Karis JH, Gissen AJ, Nastuk WL: Mode of action of diethyl ether in blocking neuromuscular transmission. *ANESTHESIOLOGY* 27:42-47, 1966
122. Gissen AJ, Karis JH, Nastuk WL: Effect of halothane on neuromuscular transmission. *JAMA* 197:770-772, 1966
123. Waud BE, Waud DR: The effects of diethyl ether, enflurane, and isoflurane at the neuromuscular junction. *ANESTHESIOLOGY* 42:275-280, 1975
124. Waud BE, Cheng MC, Waud DR: Comparison of drug-receptor dissociation constants at the mammalian neuromuscular junction in the presence and absence of halothane. *J Pharmacol Exp Ther* 187:40-46, 1973
125. Vitez TS, Miller RD, Eger EI II, et al.: Comparison *in vitro* of isoflurane and halothane potentiation of *d*-tubocurarine and succinylcholine neuromuscular blockades. *ANESTHESIOLOGY* 41:53-56, 1974
126. Katz RL: Modification of the action of pancuronium by succinylcholine and halothane. *ANESTHESIOLOGY* 35:602-608, 1971
127. Nastuk WL: Some ionic factors that influence the action of acetylcholine at the muscle end-plate membrane. *Ann NY Acad Sci* 81:317-327, 1959
128. Engbaek L: The pharmacological actions of magnesium ions with particular reference to the neuromuscular and cardiovascular system. *Pharmacol Rev* 4:396-414, 1952
129. Feldman SA: Effects of changes in electrolytes, hydration and pH upon the reactions to muscle relaxants. *Br J Anaesth* 35:546-551, 1963
130. Feldman SA: *Muscle Relaxants*. London, W. B. Saunders, 1973, chapter 11
131. Ghoneim MM, Long JP: The interaction between magnesium and other neuromuscular blocking agents. *ANESTHESIOLOGY* 32:23-27, 1970
132. Brown GL, Harvey AM: Effects of dietary calcium on neuromuscular transmission. *J Physiol (Lond)* 97:330-336, 1940
133. Del Castillo J, Katz B: Biophysical aspects of neuromuscular transmission. *Prog Biophys Biophys Chem* 6:121-170, 1956
134. Fatt P: *Skeletal neuromuscular transmission*. *Handbook of Physiology—Neurophysiology* I. Baltimore, Waverly Press, 1959, pp 199-213
135. Hodgkin AL: The ionic basis of electrical

- activity in nerve and muscle. *Biol Rev* 26: 339-409, 1951
136. Takeuchi A, Takeuchi N: On the permeability of endplate membrane during the action of the transmitter. *J Physiol (Lond)* 154:52-67, 1960
  137. Eccles JC: Neuron physiology—introduction, *Handbook of Physiology—Neurophysiology* 1. Baltimore, Waverly Press, 1959, pp 59-74
  138. Tasaki I: Conduction of nerve impulses, *Handbook of Physiology—Neurophysiology* 1. Baltimore, Waverly Press, 1959, pp 75-121
  139. Vaughan RS, Lunn JN: Potassium and the anaesthetist. *Anaesthesia* 28:118-131, 1973
  140. Miller RD, Van Nuhuis LS, Eger EI II, et al: The effect of acid-base balance on neostigmine antagonism of *d*-tubocurarine-induced neuromuscular blockade. *ANESTHESIOLOGY* 42:377-383, 1975
  141. Del Castillo J, Katz B: Statistical factors involved in neuromuscular facilitation and depression. *J Physiol (Lond)* 124:574-585, 1954
  142. Hodgkin AL, Keynes RD: Movements of labelled calcium in squid giant axons. *J Physiol (Lond)* 138:253-281, 1957
  143. Del Castillo J, Stark L: The effect of calcium ions on the motor end-plate potentials. *J Physiol (Lond)* 116:507-515, 1952
  144. Del Castillo J, Engbaek L: The nature of neuromuscular block produced by magnesium. *J Physiol (Lond)* 124:370-384, 1954
  145. Sandow A: Excitation-contraction coupling in skeletal muscle. *Pharmacol Rev* 17:265-320, 1965
  146. Payne JP: The influence of carbon dioxide on neuromuscular blocking activity of relaxant drugs in the cat. *Br J Anaesth* 30: 206-214, 1958
  147. Gamstorp I, Vinnars E: Studies in neuromuscular transmission. I. Influence on neuromuscular transmission of alkalosis and acidosis. *Acta Physiol Scand* 53:142-148, 1961
  148. Gamstorp I, Vinnars E: Studies in neuromuscular transmission. IV. Influence of changes in blood pH and carbon dioxide tension on the effect of succinylcholine. *Acta Physiol Scand* 58:48-53, 1963
  149. Baraka A: The influence of carbon dioxide on the neuromuscular block caused by tubocurarine chloride in the human subject. *Br J Anaesth* 36:272-277, 1964
  150. Katz RL, Ngai SH, Papper EM: The effect of alkalosis on the action of neuromuscular blocking agents. *ANESTHESIOLOGY* 24:18-26, 1963
  151. Hughes R: The influence of changes in acid-base balance on neuromuscular blockade in cats. *Br J Anaesth* 42:658-665, 1970
  152. Gamstorp I, Vinnars E: Studies in neuromuscular transmission. II. Influence of changes in blood pH and carbon dioxide tension on the effect of tubocurarine and dimethyl tubocurarine. *Acta Physiol Scand* 53: 160-173, 1961
  153. Payen JP: The influence of changes in blood pH on the neuromuscular blocking properties of tubocurarine and dimethyl tubocurarine in the cat. *Acta Anaesthesiol Scand* 4: 83-90, 1960
  154. Brooks DK, Feldman SA: Metabolic acidosis: A new approach to "neostigmine resistant curarization." *Anaesthesia* 17:161-169, 1962
  155. Baraka A: Irreversible tubocurarine neuromuscular block in the human. *Br J Anaesth* 39:891-894, 1967
  156. Bush GI, Baraka A: Factors affecting the termination of curarization in the human subject. *Br J Anaesth* 36:356-362, 1964
  157. Everett AJ, Lowe LA, Wilkinson S: Revision of the structure of (+)-tubocurarine chloride and (+)-chondrocurine. *Chem Commun* 1020-1021, 1970
  158. Kalow W: The influence of pH on the ionization and biological activity of *d*-tubocurarine. *J Pharmacol Exp Ther* 110:433-438, 1954
  159. Holmes PEB, Jenden DJ, Taylor DB: An attempt to determine some of the factors controlling the rate of action of curare. *J Physiol (Lond)* 106:20P, 1947
  160. Holmes PEB, Jenden DJ, Taylor DB: Analysis of the mode of action of curare on neuromuscular transmission: The effect of temperature changes. *J Pharmacol Exp Ther* 103: 382-402, 1951
  161. Bigland B, Goetzee B, MacLagan J, et al: The effect of lowered muscle temperature on the action of neuromuscular blocking drugs. *J Physiol (Lond)* 141:425-434, 1958
  162. Cannard TH, Zaimis EJ: The effect of lowered muscle temperature on the action of neuromuscular blocking drugs in man. *J Physiol (Lond)* 149:112-119, 1959
  163. Zaimis EJ, Cannard TH, Price HL: Effects of lowered muscle temperature on neuromuscular blockade in man. *Science* 128:34-35, 1958
  164. Miller RD, Van Nuhuis LS, Eger EI II: The effect of temperature on a *d*-tubocurarine neuromuscular blockade and its antagonism by neostigmine. *J Pharmacol Exp Ther* 195: 237-242, 1975
  165. McKlveen JF, Sokoll MD, Gergis SD, et al: Absence of recurarization upon rewarmining. *ANESTHESIOLOGY* 38:153-156, 1973
  166. Crankshaw DP, Cohen EN: Uptake, distribution, and elimination of skeletal muscle relaxants. *Muscle Relaxants*. Edited by RL Katz. New York, Elsevier, 1975, chapter 4
  167. Miller RD, Stevens WC, Way WL: The effect of renal failure and hyperkalemia on the duration of pancuronium neuromuscular blockade in man. *Anesth Analg (Cleve)* 52:661-666, 1972
  168. Churchill-Davidson HC, Way WL, deJong RH: The muscle relaxants and renal excretion. *ANESTHESIOLOGY* 28:540-546, 1967
  169. Singer MM, Dutton R, Way WL: Untoward results of gallamine administration during

- bilateral nephrectomy: Treatment with haemodialysis. *Br J Anaesth* 43:404-406, 1971
170. Feldman SA, Levi JA: Prolonged paresis following gallamine. *Br J Anaesth* 35:804-805, 1963
171. Lowenstein E, Goldfine C, Flacke WE: Administration of gallamine in the presence of renal failure—reversal of neuromuscular blockade by peritoneal dialysis. *ANESTHESIOLOGY* 23:837-872, 1962
172. Agoston S, Vermeer GA, Kersten UW, et al: The fate of pancuronium bromide in man. *Acta Anaesthesiol Scand* 17: 267-275, 1973
173. Cohen EL, Corbascio A, Fleischli G: The distribution and fate of *d*-tubocurarine. *J Pharmacol Exp Ther* 147:120-126, 1965
174. Waser PG, Luthi U: Verteilung, metabolismus, und elimination von <sup>3</sup>H-diallyl-nor-toxiferin (alloferin) bei katten. *Helv Physiol Pharmacol Acta* 24:259-269, 1966
175. Riordan DD, Gilbertson AA: Prolonged curarization in a patient with renal failure. *Br J Anaesth* 43:506-509, 1971
176. Dundee JW, Gray TC: Resistance to *d*-tubocurarine chloride in the presence of liver damage. *Lancet* 2:16-17, 1953
177. Aladjemoff L, Dikstein S, Shafir E: Binding of *d*-tubocurarine chloride to plasma proteins. *J Pharmacol Exp Ther* 123:43-48, 1958
178. Bovey-Nitti F: Degradazione di alcune sostanze curarizzanti per azione di colinesterasi. *Rend Ist Sup Sanita* 12:138-142, 1949
179. Katz RL, Ryan JF: The neuromuscular effects of suxamethonium in man. *Br J Anaesth* 41: 381-386, 1969
180. Pantuck EJ, Pantuck CB: Cholinesterases and anticholinesterases. *Muscle Relaxants*. Edited by RL Katz. New York, Elsevier, 1975
181. Pantuck EJ: Genetic aspects of neuromuscular blockade. *Advances in Anesthesiology: Muscle Relaxants*. New York, Harper and Row, 1967, chapter 5
182. Whittaker M, Vickers MD: Initial experiences with the cholinesterase research unit. *Br J Anaesth* 42:1016-1025, 1970
183. Kalow W: Pharmacogenetics and anesthesia. *ANESTHESIOLOGY* 25:377-392, 1964
184. Kimbrough RD, Suggs JE: Succinylcholine and pseudocholinesterase. *JAMA* 225:1532, 1973
185. Savarese JJ, Todd DP: Succinylcholine effects in anesthesia. *JAMA* 226:1359, 1973
186. Cohen PJ, Reynolds RC, Naidt J: A simple test for abnormal pseudocholinesterase. *Anesthesiology* 32:281-283, 1970
187. Lee-son S, Pilon RN, Nabor A, et al: Use of succinylcholine in the presence of atypical pseudocholinesterase. *ANESTHESIOLOGY* 43: 493-496, 1975
188. Baraka A: Hexafluoronium-suxamethonium interaction in patients with normal versus atypical cholinesterase. *Br J Anaesth* 47: 885-888, 1975
189. Kalow W, Genest K: A method for the detection of atypical forms of human serum cholinesterase. Determination of dibucaine numbers. *Can J Biochem Physiol* 35:339-346, 1957
190. Britt BA, Locker WG, Kalow W: Hereditary aspects of malignant hyperthermia. *Can Anaesth Soc J* 16:89-97, 1969
191. Ryan JF: The early treatment of malignant hyperthermia. *International Symposium on Malignant Hyperthermia*. Edited by RA Gordon, BA Britt, W Kalow. Springfield, Ill., Charles C Thomas, 1973, pp 430-440
192. Britt BA: Prevention of malignant hyperthermia. *International Symposium on Malignant Hyperthermia*. Edited by RA Gordon, BA Britt, W Kalow. Springfield, Ill., Charles C Thomas, 1973, pp 451-461
193. Isaacs H: High serum creatine phosphokinase levels in asymptomatic members of the families of patients developing malignant hyperthermia—a genetic study. *International Symposium on Malignant Hyperthermia*. Edited by RA Gordon, BA Britt, W Kalow. Springfield, Ill., Charles C Thomas, 1973, pp 331-338
194. Churchill-Davidson HC, Richardson AT: Neuromuscular transmission in myasthenia gravis. *J Physiol (Lond)* 122:252-263, 1953
195. Foldes FF, McNall PG: Myasthenia gravis: Guide for anesthesiologists. *ANESTHESIOLOGY* 23:837-372, 1962
196. Foldes FF: Regional intravenous neuromuscular block. A new diagnostic and experimental tool. *Progress in Anesthesiology (Proc 4th World Congress Anesthesiol)* Amsterdam, Excerpta Medica, 1968, p 425
197. Churchill-Davidson HC: Abnormal response to muscle relaxants. *Proc R Soc Med* 48: 621-624, 1955
198. Wise RP: A myasthenic syndrome complicating bronchial carcinoma. *Anaesthesia* 17: 488-490, 1962
199. Eaton LM, Lambert EH: Electromyography and electric stimulation of nerves in diseases of motor unit: Observations on myasthenic syndrome associated with malignant tumours. *JAMA* 163:1117-1124, 1957
200. Wise RP: Muscle disorders and the relaxants. *Br J Anaesth* 35:558-564, 1963
201. Lehmann H: Discussion on abnormal response to muscle relaxants. *Proc R Soc Med* 48: 624, 1955
202. Tabachnick HA, Thorstad JA, Wagner J, et al: A partial pharmacologic profile of the response to neuromuscular blocking agents as modified by sodium L-thyroxine. *Arch Int Pharmacodyn* 114:210-216, 1958
203. Millikan CH, Haines SF: The thyroid gland in relation to neuromuscular disease. *Arch Intern Med* 92:5-39, 1953
204. Rooke ED, Mulder DW, Eaton LM, et al: Studies of neuromuscular conduction in myasthenia gravis and related disorders. *Myasthenia Gravis, Second International*



- Symposium Proceedings. Springfield, Ill., Charles C Thomas, 1961, p 435
205. Lambert EH, Mulder DW: Electromyographic studies in myotrophic lateral sclerosis. *Proc Mayo Clin* 32:441-446, 1957
  206. Rosenbaum KS, Neigh JL, Strobel GE: Sensitivity to nondepolarizing muscle relaxants in myotrophic lateral sclerosis. *ANESTHESIOLOGY* 33:638-641, 1971
  207. Manser J: Abnormal responses in von Recklinghausen's disease. *Br J Anaesth* 42:183-184, 1970
  208. Magbagbeola JAO: Abnormal responses to muscle relaxants in a patient with von Recklinghausen's disease (multiple fibromatosis). *Br J Anaesth* 42:710, 1970
  209. Baraka A: Myasthenic response to muscle relaxants in von Recklinghausen's disease. *Br J Anaesth* 46:701-703, 1974
  210. Orndahl G: Myotonic human musculature: Stimulation with depolarizing agents. *Acta Med Scand suppl* 172:739-765, 1962
  211. Kaufman L: Anaesthesia in dystrophia myotonia: A review of the hazards of anaesthesia. *Proc R Soc Med* 53:183-188, 1960
  212. Paterson IS: Generalized myotonia following suxamethonium. *Br J Anaesth* 34:340-342, 1962
  213. Cody JR: Muscle rigidity following administration of succinylcholine. *ANESTHESIOLOGY* 29:159-162, 1968
  214. Dalal FY, Bennett EJ, Prithol RAJ, et al: Dystrophia myotonia: A multisystem disease. *Can Anaesth Soc J* 19:436-444, 1972
  215. Thiel RE: The myotonic response to suxamethonium. *Br J Anaesth* 39:815-821, 1967
  216. Geshwind N, Simpson JA: Procaine amide in the treatment of myotonia. *Brain* 78:81-91, 1955
  217. Landau WM: Essential mechanism in myotonia: An electromyographic study. *Neurology* 2:369-388, 1952
  218. McClelland RNA: The myasthenic state and the myotonic syndrome. *Br J Anaesth* 32: 81-88, 1960
  219. Reese HH, Harman JW: Hitherto unclassified muscular disorder. *Trans Am Neurol Assoc* 79:82-87, 1954
  220. Cooling C, Marrack D: Potassium secreting tumours of the colon. *Proc R Soc Med* 50: 272-274, 1957
  221. Mahler RF, Stanbury SW: Potassium losing renal disease. *Q J Med* 25:21-52, 1956
  222. Birch AA, Mitchell GD, Playford GA, et al: Changes in serum potassium response to succinylcholine following trauma. *JAMA* 210: 490-493, 1969
  223. Kopriva C, Ratliff J, Fletcher JR: Serum potassium changes after succinylcholine in patients with massive muscle trauma. *ANESTHESIOLOGY* 34:246-249, 1971
  224. Mazze RE, Escue HM, Houston JB: Hyperkalemia and cardiovascular collapse following administration of succinylcholine to the traumatized patient. *ANESTHESIOLOGY* 31: 540-547, 1969
  225. Bellin RP, Karleen CI: Cardiac arrest in the burned patient following succinylcholine administration. *ANESTHESIOLOGY* 27:516-518, 1966
  226. Cooperman LH, Strobel GE, Kennell EM: Massive hyperkalemia after administration of succinylcholine. *ANESTHESIOLOGY* 32:161-164, 1970
  227. Thomas ET: Circulatory collapse following succinylcholine. *Anesth Analg (Cleve)* 48: 333-337, 1969
  228. Stone WA, Beach TP, Hemelberg W: Succinylcholine danger in the spinal cord injured patient. *ANESTHESIOLOGY* 32:168-169, 1970
  229. Cooperman LH: Succinylcholine induced hyperkalemia in neuromuscular disease. *JAMA* 213:1867-1871, 1970
  230. Roth F, Wutrich H: The clinical importance of hyperkalemia following suxamethonium administration. *Br J Anaesth* 41:311-316, 1969
  231. Tobey RE, Jacobsen PM, Kahle CT, et al: The serum potassium response to muscle relaxants in neural injury. *ANESTHESIOLOGY* 37:332-337, 1972
  232. Isaacs H, Barlow MB: Genetic background to malignant hyperpyrexia revealed by serum creatine phosphokinase estimations in asymptomatic relatives. *Br J Anaesth* 42: 1077-1084, 1970
  233. Britt BA, Kalow W: Malignant hyperthermia: A statistical review. *Can Anaesth Soc J* 17: 293-315, 1970
  234. Kalow W, Britt BA, Terreau ME, et al: Metabolic error of muscle metabolism after recovery from malignant hyperthermia. *Lancet* 2:895-898, 1970
  235. Kalow W, Britt BA: Drugs causing rigidity in malignant hyperthermia. *Lancet* 2:390-391, 1973
  236. Ellis FR, Harriman DGF: A new screening test for susceptibility to malignant hyperpyrexia. (Proc ARS, Liverpool). *Br J Anaesth* 45: 638, 1973
  237. Branisteau DD, Volle RL: Modification by lithium of transmitter release at neuromuscular junction of frog. *J Pharmacol Exp Ther* 194:362-372, 1975
  238. Crawford AC: Lithium ions and the release of transmitter at the frog neuromuscular junction. *J Physiol (Lond)* 246:109-142, 1975
  239. Borden H, Clarke MT, Katz H: The use of pancuronium bromide in patients receiving lithium carbonate. *Can Anaesth Soc J* 21: 79-82, 1974
  240. Harvey AM: Actions of procaine on neuromuscular transmission. *Johns Hopkins Hosp Bull* 65:223-238, 1939
  241. Fulton JF Jr: Studies on neuromuscular transmission. No. 1. Action of novocaine on muscle. *Am J Physiol* 57:153, 1921

242. Hodges RJH, Bennett JR, Tunstall ME, et al: Effects of oxytocin on the response to suxamethonium. *Br Med J* 1:413-416, 1959
243. Hodges RJH: Non-depolarizing neuromuscular blocking effects due to suxamethonium following the infusion of oxytocic posterior pituitary extracts in obstetrics. *Acta Anaesthesiol Scand suppl* 2:25-26, 1959
244. Ichihayagi K, Ito Y, Aoki E: Effects of oxytocin on the response to suxamethonium and *d*-tubocurarine in man. *Br J Anaesth* 35: 611-617, 1963
245. Keil AMcL: Effects of oxytocin on the response to suxamethonium and *d*-tubocurarine in man. *Br J Anaesth* 34:306-308, 1962
246. Deacock AR de C, Davis TDW: The influence of certain ganglionic blocking agents on neuromuscular transmission. *Br J Anaesth* 30:217-225, 1958
247. Pearcey WC, Wittenstein ES: The interaction of trimethaphan (Arfonad), suxamethonium and cholinesterase inhibitors in the rat. *Br J Anaesth* 32:156-159, 1960
248. Tewfick GI: Trimethaphan: Its effect on the pseudocholinesterase level of man. *Anaesthesia* 12:326-329, 1957
249. Schmidt JL, Vick NA, Sadove MS: The effect of quinidine on the action of muscle relaxants. *JAMA* 183:669-671, 1963
250. Manzin E, Novello E, Comelli LF: Interference by quinidine on the neuromuscular block produced by succinylcholine. *Ann Med Psychol (Paris)* 103:603-607, 1972
251. Grogono AW: Anaesthesia for atrial defibrillation: Effect of quinidine on muscular relaxation. *Lancet* 2:1039-1040, 1963
252. Miller RD, Way WL, Katzung BG: The potentiation of neuromuscular blocking agents by quinidine. *ANESTHESIOLOGY* 28:1036-1039, 1967
253. Zsigmond EK, Robbins C: The effect of a series of anti-cancer drugs on plasma cholinesterase activity. *Canad Anaesth Soc J* 19:73-82, 1972
254. Wang RHH, Ross CA: Prolonged apnea following succinylcholine in cancer patients receiving AB-132. *ANESTHESIOLOGY* 24:363-367, 1963
255. Pantuck EJ: Echothiophate iodide eye drops and prolonged response to suxamethonium. *Br J Anaesth* 38:406-407, 1966
256. Gesztes T: Prolonged apnoea after suxamethonium injection associated with eye drops containing an anticholinesterase agent. *Br J Anaesth* 38:408-409, 1966
257. Benveniste D, Hemingsen L, Juul P: Tacrine inhibition of serum cholinesterase and prolonged succinylcholine action. *Acta Anaesthesiol Scand* 11:297-309, 1967
258. Foldes FF, Molloy RE, Zsigmond EK, et al: Hexafluorenum: Its anticholinesterase and neuromuscular activity. *J Pharmacol Exp Ther* 129:400-404, 1960
259. Pittinger C, Adamson R: Antibiotic blockade of neuromuscular function. *Pharmacol Rev* 12:169-184, 1972
260. Gondsouzan NG, Ryan JF, Savarese JJ: The neuromuscular effects of pancuronium in infants and children. *ANESTHESIOLOGY* 41:95-98, 1974
